# Supplementary material
Source: ML conference proceedings conference paper supplement (https://openreview.net/forum?id=BfQJrIiOZC)
Supplement: supplementary_material [file attachment]

## A Zero-shot Rademacher complexity and Proof of Theorem 1

### A.1 Problem setup and assumptions

Let  $w \in \mathcal{W} \subseteq \mathbb{R}^e$  denote an intervention and  $x \in \mathcal{X} \subseteq \mathbb{R}^d$  denote an individual that received it. Assume the outcome to predict is a scalar  $y \in [0, 1]$ . The hypothesis class is  $\mathcal{F} = \{f : (w, x) \rightarrow y\}$ . The dataset has  $n$  interventions with  $m$  independent units which received each intervention, *i.e.* first  $n$  *i.i.d.* draws from  $P_W$  and then  $m$  *i.i.d.* draws from  $P_X$  for each  $w^{(j)}$ . During training we have access to noisy estimate  $\tilde{y} = y + \xi$  where  $\xi$  is an independent noise with  $\mathbb{E}\xi = 0$  and  $|\xi| \leq \epsilon$  almost surely. We are tested directly on  $y$ .

The ERM is

$$\hat{f} = \min_f \hat{L}(f) = \min_f \frac{1}{nm} \sum_{j=1}^n \sum_{i=1}^m (f(w^{(j)}, x_i^{(j)}) - \tilde{y}_i^{(j)})^2.$$

The test error is

$$L(f) = \mathbb{E}_{w,x,y} (f(w,x) - y)^2$$

and let  $f^* = \min_f L(f)$ .

We are interested in bounding the excess error  $L(\hat{f}) - L(f^*)$ .

Our key assumption is that interventions with similar attributes ( $w$ ) have similar effects in expectation. More concretely, we assume that all hypotheses in our family are smooth with respect to  $w$ :

**Assumption 2.**

$$\forall f \in \mathcal{F}, \mathbb{E}_{w,x} \left[ \left\| \frac{\partial f}{\partial w} \right\|_2^2 \right] \leq \beta^2.$$

Furthermore, we assume that  $P_W$  satisfies a Poincaré-type inequality:

**Assumption 3.** For some constant  $C$  that only depends on  $P_W$ , for any smooth function  $F$ ,

$$\text{Var}_w[F(w)] \leq C \mathbb{E}[\|\nabla_w F(w)\|_2^2].$$

For example,  $P_W$  can be any of the following distributions:

- Multivariate Gaussian:  $w \in \mathbb{R}^e \sim \mathcal{N}(\mu, \Sigma)$  for some vector  $\mu \in \mathbb{R}^e$  and positive semi-definite matrix  $\Sigma \in \mathbb{R}^{e \times e}$ ;
- $w \in \mathbb{R}^e$  has independent coordinates; each coordinate has the symmetric exponential distribution  $1/2e^{-|t|}$  for  $t \in \mathbb{R}$ .
- $P_W$  is a mixture over base distributions satisfying Poincaré inequalities, and their pair-wise chi-squared distances are bounded.
- $P_W$  is a mixture of isotropic Gaussians in  $\mathbb{R}^e$ .
- $P_W$  is the uniform distribution over  $\mathcal{W} \subset \mathbb{R}^e$ , which is open, connected, and bounded with Lipschitz boundary.

We note that isotropic Gaussian can approximate any smooth densities in  $\mathbb{R}^e$  [39] (since RBF kernels are universal), showing that Assumption 3 is fairly general.

We define a novel notion of function complexity specialized to the zero-shot setting. Intuitively, it measure how well we can fit random labels, which is first drawing  $n$  interventions and  $m$  recipients for each intervention. For examples of concrete upper bound on zero-shot Rademacher complexity see section A.4

$$R_{nm}(F) = \frac{1}{nm} \mathbb{E}_{w,x,\sigma} \sup_f \sum_{j=1}^n \sum_{i=1}^m \sigma_i^j f(w^{(j)}, x_i^{(j)}) \quad (8)$$

where  $\sigma_i^j$  are independently randomly drawn from  $\{-1, 1\}$ .

## 623 A.2 Formal theorem statement

624 **Theorem 4.** Under Assumptions [2](#)[3](#) with probability  $1 - \delta$ ,

$$\begin{aligned} L(\hat{f}) \leq & L(f^*) + 8(1+\epsilon)R_{nm}(\mathcal{F}) + 8\sqrt{\frac{(1+\epsilon)R_{nm}(\mathcal{F})\log(1/\delta)}{n}} \\ & + (1+\epsilon)\sqrt{\frac{(32C\beta^2 + \frac{2(1+\epsilon)^2}{m})\log(1/\delta)}{n}} + \frac{2\log(1/\delta)}{3n}. \end{aligned}$$

## 625 A.3 Proof of the main theorem

626 We define the population loss on the noisy label  $\tilde{L}(f) = \mathbb{E}_{w,x,\tilde{y}}(f(w,x) - \tilde{y})^2$ . Due to independence  
627 of  $\xi$ ,  $\mathbb{E}_{w,x,y,\xi}(f(w,x) - y - \xi)^2 = \mathbb{E}_{w,x,y}(f(w,x) - y)^2 + \mathbb{E}[\xi^2] = L(f) + \mathbb{E}[\xi^2]$  for any  $f$ , so  
628  $L(\hat{f}) - L(f^*) = \tilde{L}(\hat{f}) - \tilde{L}(f^*)$ . We shall focus on bounding the latter.

629 We first need a lemma that bounds the supremum of an empirical process indexed by a bounded  
630 function class.

631 **Lemma 5** (Theorem 2.3 of [\[6\]](#)). Assume that  $X_j$  are identically distributed according to  $P$ ,  $\mathcal{G}$  is  
632 a countable set of functions from  $\mathcal{X}$  to  $\mathbb{R}$  and, and all  $g \in \mathcal{G}$  are  $P$ -measurable, square-integrable,  
633 and satisfy  $\mathbb{E}[g] = 0$ . Suppose  $\sup_{g \in \mathcal{G}} \|g\|_\infty \leq 1$ , and we denote  $Z = \sup_g \left| \sum_{j=1}^n g(X_j) \right|$ . Suppose  
634  $\sigma^2 \geq \sup_{g \in \mathcal{G}} \text{Var}(g(X_j))$  almost surely, then for all  $t \geq 0$ , we have

$$\Pr \left[ Z \geq \mathbb{E}Z + \sqrt{2t(n\sigma^2 + 2\mathbb{E}Z)} + \frac{t}{3} \right] \leq e^{-t}.$$

635 We apply Lemma [5](#) with  $X_j = (w^{(j)}, x_1^j, \dots, x_m^j, \tilde{y}_1^j, \dots, \tilde{y}_m^j)$ ,  $g(X_j) =$   
636  $\left( \frac{1}{m} \sum_i (f(w^{(j)}, x_i^{(j)}) - \tilde{y}_i^{(j)})^2 - \tilde{L}(f) \right)$ ,  $\sigma^2 = \sup_{f \in \mathcal{F}} (\text{Var}(\frac{1}{m} \sum_i (f(w^{(j)}, x_i^{(j)}) - \tilde{y}_i^{(j)})^2))$ ,  
637  $t = \log(1/\delta)$ . Since  $f - \tilde{y} \in [-1, 1]$ ,  $g \in [-1, 1]$ . With probability  $1 - \delta$ ,

$$n \sup_f |\hat{L}(f) - \tilde{L}(f)| \leq n \mathbb{E} \sup_f |\hat{L}(f) - \tilde{L}(f)| + \sqrt{2 \log \frac{1}{\delta} \left( n \sigma^2 + 2n \mathbb{E} \sup_f |\hat{L}(f) - \tilde{L}(f)| \right)} + \frac{1}{3} \log \frac{1}{\delta}.$$

638 Multiplying both sides by  $1/n$ , and using  $\sqrt{a+b} \leq \sqrt{a} + \sqrt{b}$ ,

$$\sup_f |\hat{L}(f) - \tilde{L}(f)| \leq \mathbb{E} \sup_f |\hat{L}(f) - \tilde{L}(f)| + 2 \sqrt{\frac{\mathbb{E} \sup_f |\hat{L}(f) - \tilde{L}(f)| \log(1/\delta)}{n}} + \sqrt{\frac{2\sigma^2 \log(1/\delta)}{n}} + \frac{\log(1/\delta)}{3n}. \quad (9)$$

639 The next lemma bounds the variance  $\sigma^2$  in equation [\(9\)](#).

**Lemma 6.**

$$\forall f \in \mathcal{F}, \text{Var}_{w^{(j)}, x_{1 \dots m}^j, \tilde{y}_{1 \dots m}^j} \left[ \frac{1}{m} \sum_{i=1}^m (f(w^{(j)}, x_i^{(j)}) - \tilde{y}_i^{(j)})^2 \right] \leq 4(1+\epsilon)^2 C \beta^2 + \frac{(1+\epsilon)^4}{4m}.$$

640 *Proof of Lemma [6](#)* Using the law of total variance, if we write

$$g(w^{(j)}, x_{1 \dots m}^j, \tilde{y}_{1 \dots m}^j) = \frac{1}{m} \sum_{i=1}^m (f(w^{(j)}, x_i^{(j)}) - \tilde{y}_i^{(j)})^2,$$

641 then

$$\text{Var}[g] = \text{Var}_w [\mathbb{E}_{x,\tilde{y}} [g(w,x,\tilde{y}) | w]] + \mathbb{E}_h [\text{Var}_{x,\tilde{y}} [g(w,x,\tilde{y}) | w]] \quad (10)$$

642 To bound the first term of equation [\(10\)](#), we use Poincaré-type inequalities in Assumption [3](#). For each  
643 of the example distributions, we show that they indeed satisfy Assumption [3](#).

644 **Lemma 7.** *Each of the example distributions in Assumption 3 satisfies a Poincaré-type inequality.*

645 *Proof.* • When  $P_W$  is the uniform distribution over  $\mathcal{W} \in \mathbb{R}^e$ , which is open, connected, and  
 646 bounded with Lipschitz boundary, we use Poincaré–Wirtinger inequality [57] on the smooth  
 647 function  $\mathbb{E}[g | w]$ : For some constant  $C$  that only depends on  $P_W$ ,

$$\text{Var}_w[\mathbb{E}[g | w]] \leq C \mathbb{E}[\|\nabla_w \mathbb{E}[g | w]\|_2^2]. \quad (11)$$

648  $C$  is the Poincaré constant for the domain  $\mathcal{W}$  in  $L_2$  norm. It can be bounded by  $1/\lambda_1$  where  
 649  $\lambda_1$  is the first eigenvalue of the negative Laplacian of the manifold  $\mathcal{W}$  [83]. Many previous  
 650 works study the optimal Poincaré constants for various domains [43]. For example, when  $w$  is  
 651 uniform over  $\mathcal{W}$  which is a bounded, convex, Lipschitz domain with diameter  $d$ ,  $C \leq d/\pi$  [56].

652 We can apply probabilistic Poincaré inequalities over non-Lebesgue measure  $P_W$ :

- 653 • When  $w \sim \mathcal{N}(\mu, \Sigma)$ , we use the Gaussian Poincaré inequality (see e.g. Theorem 3.20 of [5]  
 654 and using change of variables),

$$\text{Var}[F(w)] \leq \mathbb{E}[\langle \Sigma \nabla_w F(w), \nabla_w F(w) \rangle].$$

655 We apply this with  $F(w) = \mathbb{E}[g | w]$ . Since  $\mathbb{E}[v^\top A v] = \mathbb{E}[\text{Tr}(v^\top A v)] = \mathbb{E}[\text{Tr}(A v v^\top)] =$   
 656  $\text{Tr}(A \mathbb{E}[v v^\top]) \leq \|A\|_2 \mathbb{E}[\|v\|_2^2]$ ,

$$\text{Var}_w[\mathbb{E}[g | w]] \leq \|\Sigma\|_2 \mathbb{E}[\|\nabla_w \mathbb{E}[g | w]\|_2^2],$$

657 which satisfies equation (11) with  $C = \|\Sigma\|_2$ .

- 658 • When  $w \in \mathbb{R}^e$  has independent coordinates  $w_1, \dots, w_e$  and each coordinate has the symmetric  
 659 exponential distribution  $1/2e^{-|t|}$  for  $t \in \mathbb{R}$ , we first bound a single dimension using Lemma  
 660 4.1 of [45], which says for any function  $k \in L^1$ ,

$$\text{Var}(k(w_i)) \leq 4 \mathbb{E}[k'(w_i)^2]$$

661 which, combined with the Efron-Stein inequality (Theorem 3.1 of [5]),

$$\text{Var}(F(w)) = \mathbb{E} \sum_{i=1}^e \text{Var}(F(w) | w_1, \dots, w_{i-1}, w_{i+1}, \dots, w_n),$$

662 yields:

$$\text{Var}(F(w)) \leq 4 \mathbb{E}[\|F'(w)\|_2^2]$$

663 which satisfies equation (11) with  $C = 4$ .

664 Lastly, we consider the case where  $P_W$  is a mixture over base distributions satisfying Poincaré  
 665 inequalities. We first consider the case where the pair-wise chi-squared distances are bounded. Next,  
 666 we show that mixture of isotropic Gaussians satisfies Poincaré inequality without further condition  
 667 on pair-wise chi-squared distances.

- 668 • When  $\{P_W^q\}_{q \in \mathcal{Q}}$  is a family of distributions, each satisfying Poincaré inequality with constant  
 669  $C^q$ , and  $P_W$  is any mixture over  $\{P_W^q\}_{q \in \mathcal{Q}}$  with density  $\mu$ , let  $K_P(\mu) = \text{ess}_\mu \sup_q C^q$ ,  
 670 which is an upper bound on the base Poincaré constants almost surely, and  $K_{\chi^2}(\mu) =$   
 671  $\mathbb{E}_{q, q' \sim \mu}[(1 + \chi^2(P_W^q || P_W^{q'}))^p]^{1/p}$ , which is an upper bound on the pairwise  $\chi^2$ -divergence.  
 672 Using Theorem 1 of [8] we get that  $P_W$  satisfies Poincaré inequality with constant  $C$  such  
 673 that  $C \leq K_P(\mu)(p^* + K_{\chi^2}^p(\mu))$  where  $p^*$  is the dual exponent of  $p$  satisfying  $1/p + 1/p^* = 1$ .

674 As an example, when base distributions are from the same exponential family and  
 675 the natural parameter space is affine, such as mixture of Poisson or Multinomial dis-  
 676 tributions, the pair-wise chi-squared distances are bounded (under some additional  
 677 conditions) and hence the mixture satisfies Poincaré inequality. More formally, let  
 678  $p_\theta(x) = \exp(T(x)^\top \theta - F(\theta) + k(x))$  where  $\theta \in \Theta$  is the natural parameter space and  $A(\theta)$   
 679 is the log partition function. Lemma 1 in [54] shows that

$$\chi^2(p_{\theta_1} || p_{\theta_2}) = e^{(A(2\theta_2 - \theta_1) - (2A(\theta_2) - A(\theta_1)))} - 1,$$

which is bounded as long as  $2\theta_2 - \theta_1 \in \Theta$ . This is satisfied for mixture of 1-D Poisson distributions which can be written as  $p(w|\lambda) = \frac{1}{w!} \exp(w \log \lambda - \lambda)$  with natural parameter space  $\mathbb{R}$ , and mixture of  $e$ -dimensional Multinomial distributions  $p(w|\pi) = \exp\left(\langle w, \log(\pi / (1 - \sum_{i=1}^{e-1} \pi_i)) \rangle + \log(1 - \sum_{i=1}^{e-1} \pi_i)\right)$  with natural parameter space  $\mathbb{R}^{e-1}$ . When applied to Gaussian family the natural parameters are

$$\theta_q = \begin{pmatrix} \Sigma_q^{-1} \mu_q \\ \text{vec}(-\frac{1}{2} \Sigma_q^{-1}) \end{pmatrix}.$$

Since the covariance has to be positive definite matrices,  $2\theta_q - \theta_{q'}$  may not be a set of valid natural parameter. We deal with this in the next case.

- When  $\{P_W^q\}_{q \in \mathcal{Q}}$  is a mixture of isotropic Gaussians, each with mean  $\mu_q \in \mathbb{R}^e$  and covariance  $\Sigma_q = \sigma_q^2 I_e$ , each satisfying Poincaré inequality with constant  $C^q$  (in the single-Gaussian case above we know that  $C^q \leq \sigma_q^2$ ),  $P_W$  also satisfies Poincaré inequality. We prove this via induction. The key lemma is below:

**Lemma 8** (Corollary 1 of [64]). *Suppose measure  $p_0$  is absolutely continuous with respect to measure  $p_1$ , and  $p_0, p_1$  satisfy Poincaré inequality with constants  $C_0, C_1$  respectively, then for all  $\alpha \in [0, 1]$  and  $\beta = 1 - \alpha$ , mixture measure  $p = \alpha p_0 + \beta p_1$  satisfies Poincaré inequality with  $C \leq \max\{C_0, C_1(1 + \alpha \chi_1)\}$  where  $\chi_1 = \int \frac{dp_0}{dp_1} dp_0 - 1$ .*

We sort the components in the order of non-decreasing  $\sigma_q^2$ , and add in each component one by one. For each new component  $i = 2, \dots, |\mathcal{Q}|$ , we apply the above lemma with  $p_0$  being mixture of  $P_W^1, \dots, P_W^{i-1}$  and  $p_1$  being the new component  $P_W^i$ . We only need to prove that  $\chi_1$  is bounded at every step. Suppose  $p_0 = \sum_{j=1}^{i-1} \alpha_j P_W^j$  with  $\sum_{j=1}^{i-1} \alpha_j = 1$ ,  $p_1 = P_W^i$ , and  $P_W^j = \frac{1}{(2\pi)^{e/2} \sigma_j^e} \exp\{-\frac{1}{2}(w - \mu_j)^\top \Sigma_j^{-1}(w - \mu_j)\}$ . Therefore

$$\begin{aligned} \chi_1 + 1 &= \int \frac{dp_0}{dp_1} dp_0 = \int_w \frac{p_0(w)^2}{p_1(w)} dw \\ &= \int_w \frac{\sum_{j=1}^{i-1} \frac{\alpha_j^2}{\sigma_j^{2e}} \exp\left\{-\frac{\|w - \mu_j\|^2}{\sigma_j^2}\right\} + \sum_{j=1}^{i-1} \sum_{j' \neq j} \frac{2\alpha_j \alpha_{j'}}{\sigma_j^e \sigma_{j'}^e} \exp\left\{-\frac{\|w - \mu_j\|^2}{2\sigma_j^2} - \frac{\|w - \mu_{j'}\|^2}{2\sigma_{j'}^2}\right\}}{\frac{(2\pi)^{e/2}}{\sigma_i^e} \exp\left\{-\frac{\|w - \mu_i\|^2}{2\sigma_i^2}\right\}} dw \end{aligned}$$

The convergence condition of the above integral is  $2\sigma_i^2 \geq 2\sigma_j^2$  for all  $j < i$  which is satisfied when  $\sigma_i^2 \geq \sigma_j^2$ .

□

Next we observe that

$$\nabla_w \mathbb{E}[g|w] = \nabla_w \int_{x, \tilde{y}} (f(w, x) - \tilde{y})^2 p(x, \tilde{y}) dx d\tilde{y} = 2 \int_{x, y} (f(w, x) - \tilde{y}) \frac{\partial f}{\partial w} p(x, \tilde{y}) dx d\tilde{y} = 2 \mathbb{E}\left[(f(w, x) - \tilde{y}) \frac{\partial f}{\partial w}\right].$$

Since  $|f(w, x) - \tilde{y}| \leq 1 + \epsilon$  almost surely,  $\mathbb{E}\left[\left\|\frac{\partial f}{\partial w}\right\|_2^2\right] \leq \beta^2$ ,

$$\mathbb{E}_h[\|\nabla_w \mathbb{E}[g|w]\|_2^2] = 4 \mathbb{E}\left[\left\|(f(w, x) - y) \frac{\partial f}{\partial w}\right\|_2^2\right] \leq 4(1 + \epsilon)^2 \beta^2.$$

Therefore

$$\text{Var}_w[\mathbb{E}[g|w]] \leq C \mathbb{E}[\|\nabla_w \mathbb{E}[g|w]\|_2^2] \leq 4(1 + \epsilon)^2 C \beta^2.$$

To bound the second term of equation (10), we use concentration of mean of  $m$  i.i.d. random variables.

707 Conditioned on  $w^{(j)}$ , each of the loss  $(f(w^{(j)}, x_i^{(j)}) - \tilde{y}_i^{(j)})^2$  are *i.i.d.* and bounded in  $[0, (1+\epsilon)^2]$ .  
 708 Hence each variable has variance upper bound  $((1+\epsilon)^2 - 0)^2/4 = (1+\epsilon)^4/4$  and the mean has  
 709 variance upper bound  $(1+\epsilon)^4/4m$ .  
 710 Therefore  $\text{Var}[g] \leq 4(1+\epsilon)^2 C\beta^2 + (1+\epsilon)^4/4m$ .  $\square$

*Proof of Theorem 4*

$$\begin{aligned}
 & L(\hat{f}) - L(f^*) \leq 2 \sup_{f \in \mathcal{F}} |\tilde{L}(f) - \hat{L}(f)| \\
 & \leq 2 \mathbb{E} \sup_f |\tilde{L}(f) - \hat{L}(f)| + 4 \sqrt{\frac{\mathbb{E} \sup_f |\tilde{L}(f) - \hat{L}(f)| \log(1/\delta)}{n}} + \sqrt{\frac{(32(1+\epsilon)^2 C\beta^2 + \frac{2(1+\epsilon)^4}{m}) \log(1/\delta)}{n}} + \frac{2 \log(1/\delta)}{3n}
 \end{aligned} \tag{12}$$

712 by equation (9) and Lemma 6

713 We now show that  $\mathbb{E} \sup_f |\tilde{L}(f) - \hat{L}(f)| \leq 2(1+\epsilon) R_{nm}(F)$ . This is similar to the argument for  
 714 classical Rademacher complexity

$$\begin{aligned}
 & \mathbb{E}_{w,x,\tilde{y}} \sup_f \left( \frac{1}{nm} \sum_{i,j} (f(w^{(j)}, x_i^{(j)}) - \tilde{y}_i^{(j)})^2 - \mathbb{E}_{w,x,\tilde{y}} (f(w^{(j)}, x_i^{(j)}) - \tilde{y}_i^{(j)})^2 \right) \\
 & \leq \frac{1}{nm} \mathbb{E}_{S,S'} \sup_f \left( \sum_{i,j} [(f(w^{(j)}, x_i^{(j)}) - \tilde{y}_i^{(j)})^2 - (f(w'^{(j)}, x_i'^{(j)}) - \tilde{y}_i'^{(j)})^2] \right) \\
 & = \frac{1}{nm} \mathbb{E}_{S,S',\sigma} \sup_f \left( \sum_{i,j} [\sigma_i^j (f(w^{(j)}, x_i^{(j)}) - \tilde{y}_i^{(j)})^2 - \sigma_i^j (f(w'^{(j)}, x_i'^{(j)}) - \tilde{y}_i'^{(j)})^2] \right) \\
 & \leq \frac{1}{nm} \mathbb{E}_{S,\sigma} \sup_f \left( \sum_{i,j} \sigma_i^j (f(w^{(j)}, x_i^{(j)}) - \tilde{y}_i^{(j)})^2 \right) + \frac{1}{nm} \mathbb{E}_{S',\sigma} \sup_f \left( \sum_{i,j} \sigma_i^j (f(w'^{(j)}, x_i'^{(j)}) - \tilde{y}_i'^{(j)})^2 \right) \\
 & = 2R_{nm}(\tilde{\mathcal{L}}).
 \end{aligned}$$

715 where the first inequality uses Jensen's inequality and convexity of  $\sup$ .

716 Now we prove the equivalent of Talagrand's contraction lemma to show that  $R_{nm}(\tilde{\mathcal{L}}) \leq 2R_{nm}(\mathcal{F})$ .

717 Note that the squared loss is  $2(1+\epsilon)$ -Lipschitz since  $\left| \frac{\partial (f-\tilde{y})^2}{\partial f} \right| = 2|f-\tilde{y}| \leq 2(1+\epsilon)$ . We use the  
 718 following lemma to prove this:

719 **Lemma 9** (Lemma 5 of [49]). *Suppose  $\{\phi_i\}, \{\psi_i\}, i=1, \dots, N$  are two sets of functions on  $\Theta$  such*  
 720 *that for each  $i$  an  $\theta, \theta' \in \Theta$ ,  $|\phi_i(\theta) - \phi_i(\theta')| \leq |\psi_i(\theta) - \psi_i(\theta')|$ . Then for all functions  $c: \Theta \rightarrow \mathbb{R}$ ,*

$$\mathbb{E}_\sigma \left[ \sup_\theta \left\{ c(\theta) + \sum_{i=1}^N \sigma_i \phi_i(\theta) \right\} \right] \leq \mathbb{E}_\sigma \left[ \sup_\theta \left\{ c(\theta) + \sum_{i=1}^N \sigma_i \psi_i(\theta) \right\} \right]$$

721 For any set of  $w, x$ , we apply Lemma 9 with  $\Theta = \mathcal{F}$ ,  $\theta = f$ ,  $N = nm$ ,  $\phi_{ij}(f) = (f(w^{(j)}, x_i^{(j)}) - \tilde{y}_i^{(j)})^2$ ,  
 722  $\psi_{ij}(f) = 2(1+\epsilon)f(w^{(j)}, x_i^{(j)})$ , and  $c(\theta) = 0$ . Since  $|(f-\tilde{y})^2 - (f'-\tilde{y})^2| \leq 2(1+\epsilon)|f-f'|$ , so the  
 723 condition for Lemma 9 hold. We take expectation over  $w, x$  and divide both sides by  $nm$  to get

$$\frac{1}{nm} \mathbb{E}_{w,x,\sigma} \sup_f \sum_{j=1}^n \sum_{i=1}^m \sigma_i^j (f(w^{(j)}, x_i^{(j)}) - \tilde{y}_i^{(j)})^2 \leq \frac{2(1+\epsilon)}{nm} \mathbb{E}_{w,x,\sigma} \sup_f \sum_{j=1}^n \sum_{i=1}^m \sigma_i^j f(w^{(j)}, x_i^{(j)})$$

724 which means  $R_{nm}(\mathcal{L}) \leq 2(1+\epsilon) R_{nm}(\mathcal{F})$ . Substituting this into inequality (12) finishes the proof.

725  $\square$

#### A.4 Zero-shot Rademacher complexity bound for the linear hypothesis class

Consider the linear classifier  $F = \{(w_1^\top w + w_2^\top x : \|w_1\|_2 \leq B, \|w_2\|_2 \leq C)\}$ . Suppose  $\|w\|_2 \leq 1$  and  $\|x\|_2 \leq 1$ .

$$\begin{aligned} R_{nm}(F) &= \frac{1}{nm} \mathbb{E}_{\sigma, w, x} \sup_w \left\{ \langle w_1, \sum_{ij} \sigma_i^j w^{(j)} \rangle + \langle w_2, \sum_{ij} \sigma_i^j x_i^{(j)} \rangle \right\} \\ &= \frac{1}{nm} \left( B_1 \mathbb{E}_{\sigma, w} \left\| \sum_{ij} \sigma_i^j w^{(j)} \right\|_2 + B_2 \mathbb{E}_{\sigma, x} \left\| \sum_{ij} \sigma_i^j x_i^{(j)} \right\|_2 \right) \\ &\leq \frac{1}{nm} \left( B_1 \sqrt{m \sum_j \|w^{(j)}\|_2^2} + B_2 \sqrt{\sum_{ij} \|x_i^{(j)}\|_2^2} \right) \\ &= (B_1 + B_2) / \sqrt{nm}. \end{aligned}$$

We observe that the bound is the same as the standard Rademacher complexity for  $nm$  independent samples, which is interesting. The relationship between standard and zero-shot Rademacher complexity for other function classes is an important future direction.

## B Extended Related Work

Our approach to zero-shot prediction of intervention effects is related to recent advances in heterogeneous treatment effect (HTE) estimation, zero-shot learning, and meta-learning.

### B.1 Heterogenous treatment effect (HTE) estimation

**Conditional average treatment effect (CATE) estimation.** A number of approaches have been developed to predict the effect of an existing intervention on an individual or subgroup, based on historical data from individuals who received it. This problem is often referred to in the literature as heterogeneous treatment effect (HTE) estimation [26, 11], to denote that the goal is to detect heterogeneities in how individuals respond to an intervention. A more specific instance of HTE estimation, which we focus on here, is conditional average treatment effect (CATE) estimation [76, 42], in which the goal is to predict the effect of a treatment *conditioned* on an individual’s features. A variety of methods and specific models have been developed to achieve this goal [26, 32, 21, 28, 76, 66, 1, 84, 24, 86, 25, 14, 12, 42, 34, 11, 2], and we refer to Bica et al. and Curth et al. for a detailed review of these methods [4, 14]. These methods estimate CATE for an existing intervention, based on historical data from individuals who received it and those that did not.

While these approaches have a number of useful applications, they do not address CATE for novel interventions which did not exist during training (zero-shot). Our primary contribution is a meta-learning framework to leverage these existing CATE estimators for zero-shot predictions. In the CaML framework (Figure 2), each task corresponds to predicting CATE for a single intervention. We synthesize a task by sampling a natural experiment for each intervention, and then use any existing CATE estimator to generate a noisy target label for our the task (Step 2: estimate pseudo-outcomes). We rely on pseudo-outcome estimates as training labels because prior work has shown that training on observed outcomes directly leads to biased CATE estimates [9, 42, 34], a result which we find holds true in our experiments as well (see T-learner and S-learner w/ meta-learning in Tables 2 and 3).

**Pseudo-outcome estimators.** Prior work has developed a variety of methods to estimate CATE pseudo-outcomes, which are noisy but unbiased estimates of CATE, such as the X-learner [42], R-learner [53], DR-learner [34], and RA-learner [14]. Moreover, the outputs of any other CATE estimation method, such as methods which directly estimate CATE via an end-to-end neural network [32, 66, 68] are an equally valid choice of pseudo-outcome. The literature on pseudo-outcome estimation is growing continuously as new estimators are being developed [19, 38]. Typically, these estimators are specific to a *single binary intervention*, for which a set of nuisance models are trained and used to compute the pseudo-outcomes. As such, applying meta-learning algorithms to these pseudo-outcomes requires synthesizing a natural experiment for each intervention, which corresponds to a single task in the CaML framework.

**Multi-cause estimators.** Our methods to address zero-shot CATE estimation for combinations of interventions are distinct from multi-cause estimators for combinations of binary or categorical interventions [78, 58, 62]. Recent work has shown that these methods can predict the effects of new combinations of interventions [48], when every intervention in the combination has been observed at some point during. However, these methods do not estimate CATE for novel interventions which did not exist during training. By contrast, CaML estimates CATE for zero-shot intervention combinations in which none of the interventions in the combo was ever observed during training (Appendix Table C).

## B.2 Zero-shot learning

Zero-shot learning (ZSL) has traditionally aimed to reason over new concepts and classes [80, 60] which did not exist during training time. While ZSL has primarily focused on natural language processing and computer vision [77], recent interest has been sparked in generalizing over novel interventions (zero-shot) in the biomedical domain [61, 27] in which data can be cheaply collected for hundreds or thousands of possible interventions [87, 71, 17]. However, general-purpose zero-shot causal methods have been largely unexplored. Notable exceptions include GranITE [23] and SIN [23], which each extend a specific CATE estimation [53, 42] method to incorporate intervention features ( $W$ ). However, these approaches have significant drawbacks, which we discuss in Section 2.

## B.3 Meta-learning

Meta-learning, or *learning to learn*, aims to train models which can quickly adapt to new settings and tasks. The key idea is to enable a model to gain experience over multiple learning episodes - in which episodes typically correspond to distinct tasks - to accelerate learning in subsequent learning episodes [30]. The meta-learning literature is rich and spans multiple decades [72, 65, 63, 3], with recent interest focused on model-agnostic methods to train deep learning models to quickly adapt to new tasks [18, 59, 52]. A common focus in the meta-learning literature is few-shot learning, in which a model must adapt to a new task given a small support set of labeled examples. By contrast, we focus on the zero-shot setting, in which no such support set exists. However, we hypothesize that the typical meta-learning problem formulation and training algorithms may also improve zero-shot performance. Thus, CaML’s problem formulation and algorithm inspiration from the meta-learning literature, particularly the Reptile algorithm [52] and its application to other tasks in causal inference [67]. Our experimental results show that this meta-learning formulation improves CaML’s performance, compared to a standard multi-task learning strategy.

# C Experimental details

## C.1 Experimental setup

Here, we provide more details about the experimental setup for each investigated setting. This serves to complement the high-level overview given in Table I. Experiments were run using Google Cloud Services. Deep learning-based methods (*i.e.*, CaML and its ablations, S-learner w/ meta-learning, T-learner w/ meta-learning, SIN, GraphITE, FlexTENET, TARNet, and DragonNet) were run on n1-highmem-64 machines with 4x NVIDIA T4 GPU devices. The remaining baselines (RA-learner, R-learner, X-learner, and T-learner) were run on n1-highmem-64 machines featuring 64 CPUs.

**Fair comparison.** We perform hyper-parameter optimization with random search for all models, with the meta-testing dataset predetermined and held out. To avoid “hyperparameter hacking”, hyperparameters ranges are consistent between methods wherever possible, and were chosen using defaults similar to prior work [33, 23]. Choice of final model hyper-parameters was determined using performance metrics (specific to each dataset) computed on the meta-validation dataset, using the best hyper-parameters over 48 runs (6 servers x 4 NVIDIA T4 GPUs per server x 2 runs per GPU) (Appendix C.4). All table results are computed as the mean across 8 runs of the final model with distinct random seeds.

### C.1.1 Claims dataset

**Interventions ( $W$ ):** We consider drug prescriptions consisting of either one drug, or two drugs prescribed in combination. We observed 745 unique single drugs, and 22,883 unique drug pairs, excluding interventions which occurred less than 500 times. Time of intervention corresponds to the *first* day of exposure. To obtain intervention information, we generated pre-trained drug embeddings



from a large-scale biomedical knowledge graph [7] (see Appendix C.5). Drugs correspond to nodes in the knowledge graph, which are linked to other nodes (e.g. genes, based on the protein target of the drug). Drug combination embeddings are the sum of the embeddings for their constituent drugs.

**Control group.** A challenge in such causal analyses of clinical settings is defining a control group. We randomly sample 5% (1.52M patients) to use as controls, with a 40/20/40 split between meta-train/meta-val/meta-test. When sampling a natural experiment for a given intervention, we select all patients from this control group that did not receive such an intervention. An additional challenge is defining time of intervention for the control group. It is not possible to naively sample a random date, because there are large quiet periods in the claims dataset in which no data is logged. We thus sample a date in which the control patient received a *random drug*, and thus our measure of CATE estimates the *increase* in side effect likelihood from the drug(s)  $W$ , compared to another drug intervention chosen at random.

**Outcome (Y):** We focus on the side effect pancytopenia: a deficiency across all three blood cell lines (red blood cells, white blood cells, and platelets). Pancytopenia is life-threatening, with a 10-20% mortality rate [36, 41], and is a rare side effect of many common medications [40] (e.g. arthritis and cancer drugs), which in turn require intensive monitoring of the blood work. Our outcome is defined as the (binary) occurrence of pancytopenia within 90 days of intervention exposure.

**Features (X):** Following prior work [22], patient medical history features were constructed by time-binned counts of each unique medical code (diagnosis, procedure, lab result, drug prescription) before the drug was prescribed. In total, 443,940 features were generated from the following time bins: 0-24 hours, 24-48 hours, 2-7 days, 8-30 days, and 31-90 days, 91-365 days, and 365+ days prior. All individuals in the dataset provided by the insurance company had at least 50 unique days of claims data.

**Metrics:** We rely on best practices for evaluating CATE estimators as established by recent work [81, 10], which recommend to assess treatment rules by comparing subgroups across different quantiles of estimated CATE. We follow the high vs. others RATE (rank-weighted average treatment effect) approach from Yadlowsky et. al [81], which computes the difference in average treatment effect (ATE) of the top  $u$  percent of individuals (ranked by predicted CATE), versus all individuals:

$$RATE@u = \mathbb{E}[Y(1) - Y(0) | F_S(S(X)) \geq 1 - u] - \mathbb{E}[Y(1) - Y(0)], \quad (13)$$

where  $S(\cdot)$  is a priority score which ranks samples lowest to highest predicted CATE, and  $F_S(\cdot)$  is the cumulative distribution function (CDF) of  $S(X_i)$ . For instance, RATE @ 0.99 would be the difference between the top 1% of the samples (by estimated CATE) vs. the average treatment effect (ATE) across all samples, which we would expect to be high if the CATE estimator is accurate. The real-world use case of our model would be preventing drug prescription a small subset of high-risk individuals. Thus, more specifically, for each task  $j$ , intervention  $w_j$  in the meta-dataset, and meta-model  $\Psi_\theta$  (our priority score  $S(\cdot)$ ), we compute  $RATE@u$  for each  $u$  in  $[0.999, 0.998, 0.995, 0.99]$  across individuals who received the intervention.

We now summarize how to estimate RATE performance metrics for a single intervention (task). As RATE performance is calculated separately per-intervention we are concerned with a single intervention, we use the simplified notation (i.e.  $Y_i(1)$  instead of  $Y_i(w)$ ) from Section 3. Due to the fundamental problem of causal inference (we can only observe  $Y_i(0)$  or  $Y_i(1)$  for a given sample), the true RATE, as defined above, cannot be directly observed.

We follow the method outlined in Section 2.2 and 2.4 of Yadlowsky et. al. [81] in which we compute  $\hat{\Gamma}_i$ , a (noisy but unbiased) estimate for CATE which is in turn used to estimate RATE:

$$\mathbb{E}[\hat{\Gamma}_i | X_i] \approx \tau(X_i) = \mathbb{E}[Y_i(1) - Y_i(0) | X_i]. \quad (14)$$

Our data is observational, and as such we can estimate  $\hat{\Gamma}_i$  using a direct non-parametric estimator [75]:

$$\hat{\Gamma}_i = W_i(Y_i - \hat{m}(X_i, 0)) + (1 - W_i)(\hat{m}(X_i, 1) - Y_i) \quad (15)$$

$$m(x, w) = \mathbb{E}[Y_i(w) | X_i = x] \quad (16)$$

where  $m(x, w)$  is a model that predicts the outcome. Here  $\hat{m}(x, w)$  represent nonparametric estimates of  $m(x, w)$ , respectively, which we obtain by fitting a cross-fitting a model to the intervention natural experiment over 5-folds. We use random forest models for  $\hat{m}(x, w)$ , as they perform well (achieving  $\geq 0.90$  ROC AUC across all meta-testing tasks for predicting outcomes) and are robust to choice of hyperparameters.



RATE can then be estimated via sample-averaging estimator. Specifically, we compute the difference between the average value of  $\hat{\Gamma}_i$  for those in the top  $u$  percent of individuals (based on our meta-model’s predictions), compared to the average  $\hat{\Gamma}_i$  across all individuals. For further discussion on estimating RATE, we refer readers to [81]. Note that estimates of RATE are *unbounded*: RATE can be less than 0 (due to predictions inversely relating to CATE).

Finally, because our meta-testing dataset consists of individuals treated with drugs *known* in the medical literature to cause pancytopenia (identified by filtering drugs using the side effect database SIDER [40]), observational metrics of recall and precision are also a rough *proxy* for successful CATE estimation. Thus, as secondary metrics, we also compute  $Recall@u$  and  $Precision@u$  for the same set of thresholds as RATE, where a positive label is defined as occurrence of pancytopenia after intervention. We find that these metrics are highly correlated to RATE in our performance results.

**Training & Evaluation:** For each method, we ran a hyperparameter search with 48 random configurations (48 due to running 8 jobs in parallel on 6 servers each) that were drawn uniformly from a pre-defined hyperparameter search space (see Appendix C.4). Methods that can be trained on multiple tasks to then be applied to tasks unseen during training (*i.e.*, CaML and its ablations, S-learner w/ meta-learning, T-learner w/ meta-learning, SIN, GraphITE) were trained for 24 hours (per run) on the meta-training tasks. Model selection was performed on the meta-validation tasks by maximizing the mean RATE@0.998 across meta-validation tasks. Then, the best hyperparameter configuration was used to fit 8 repetition runs across 8 different random seeds. Each repetition model was then tested on the meta-testing tasks, where for all metrics averages across the testing tasks are reported. To make the setting of multi-task models comparable with single-task models that were trained on meta-testing tasks (requiring a train and test split of each meta-testing task), the evaluation of all models was computed on the test split of the meta-testing tasks, respectively. Single-task baselines (FlexTENET, TARNet, and DragonNet, RA-learner, R-learner, X-learner, and T-learner) were given access to the meta-testing tasks during training. Specifically, model selection was performed on the meta-validation tasks, while the best hyperparameter configuration was used to train 8 repetition models (using 8 random seeds) on the train split of each meta-testing task. For the final evaluation, each single-task model that was fit on meta-testing task  $i$  was tested on the test split of the same meta-testing task  $i$ , and the average metrics were reported across meta-testing tasks.

## C.1.2 LINCS

**Interventions ( $W$ ):** Interventions in the LINCS dataset consist of a single perturbagen (small molecule). For intervention information, we used the molecular embeddings for each perturbagen using the RDKit featurizer. The same cell line-perturbagen combinations are tested with different perturbagen dosages and times of exposure. [44]. To maintain consistency in experimental conditions while also ensuring that the dataset is sufficiently large for training a model, we filter for most frequently occurring dosage and time of exposure in the dataset, which are  $10\mu M$  and 24 hours, respectively. We use data from 10,322 different perturbagens.

**Control group.** For each perturbagen (at a given timepoint and dose), we use cell lines which did not receive that intervention as the control group.

**Outcomes ( $Y$ ):** We measure gene expression across the top-50 and top-20 landmark differentially expressed genes (DEGs) in the LINCS dataset. Accurately predicting in gene expression in these DEGs is most crucial to the drug discovery process.

**Features ( $X$ ):** We use 19,221 features from the Cancer Cell Line Encyclopedia (CCLE) [20] to describe each cell-line, based on historical gene expression values in a different lab environment. Our dataset consisted of 99 unique cell lines (after filtering for cell-lines with CCLE features).

**Metrics:** A key advantage of experiments on cells is that at evaluation time we can observe both  $Y(0)$  and  $Y(1)$  for the same cell line  $X$ , through multiple experiments on clones of the same cell-line in controlled lab conditions. In the LINCS dataset,  $Y(0)$  is also measured for all cells which received an intervention. Thus, we can directly compute the Precision Estimation of Heterogenous Effects (PEHE) on all treated cells in our meta-testing dataset. PEHE is a standard metric for CATE estimation performance [28], analogous to mean squared error (MSE).

$$PEHE = \frac{1}{N} \sum_{i=1}^N (\tau_i - \hat{\tau}_i)^2 \quad (17)$$

**Training & Evaluation:** For each method, we ran a hyperparameter search with 48 random configurations (48 due to running 8 jobs in parallel on 6 servers each) that were drawn uniformly from a pre-defined hyperparameter search space (see Appendix C.4). Methods that can be trained on multiple tasks to then be applied to tasks unseen during training (*i.e.*, CaML and its ablations, S-learner w/ meta-learning, T-learner w/ meta-learning, SIN) were trained for 12 hours (per run) on the meta-training tasks. Model selection was performed on the meta-validation tasks by minimizing the overall PEHE for the Top-20 most differentially expressed genes (DEGs) across meta-validation tasks. Then, the best hyperparameter configuration was used to fit 8 repetition runs across 8 different random seeds. Each repetition model was then tested on the meta-testing tasks, where for all metrics averages across the testing tasks are reported.

## C.2 Selecting holdout interventions for meta-validation and meta-testing

### C.2.1 Claims.

In the 30.4 million patient insurance claims dataset, each intervention task in meta-train/meta-val/meta-testing corresponds to a natural experiment of multiple patients, with some interventions (*e.g.* commonly prescribed drugs) having millions of associated patients who were prescribed the drug. One challenge is that in this setting, there is overlap in subjects between the natural experiments sampled by CaML, which can lead to data leakage between training and testing. For instance, if a patient received Drug 1 (in meta-test) and Drug 2 (meta-train), they would appear in both natural experiments, resulting in data leakage.

We take a conservative approach and exclude all patients who have ever received a meta-testing drug in their lifespan from the natural experiments for meta-val/meta-train. Similarly, we exclude all patients who received a meta-validation drug from meta-training.

This approach means we must take great care in selecting meta-testing drugs. Specifically, we must trade off between selecting drugs that are important (covering enough patients) while not diminishing the training dataset size. For instance selecting a commonly prescribed (*e.g.* aspirin) for meta-testing would deplete our meta-training dataset by over 50% of patients. Thus we only selected meta-test/meta-validation drugs which were prescribed to between 1,000,000 and 100K patients in our dataset, after filtering for only drugs which known to cause Pancytopenia [40] (using the SIDER database). From this subset of drugs, we randomly selected 10 meta-testing drugs and 2 meta-validation drugs, resulting in a total meta-testing/meta-validation pool of 4.1 million patients and 685K patients respectively.

To evaluate on unseen pairs of drugs on the same hold-out test dataset, we additionally created a second pairs testing dataset from the 5 most frequently occurring combinations from the meta-testing dataset. This allowed us to train a single model on the same meta-train split and evaluate on both single drug and drug pair interventions without occurrence of data leakage. Designing a larger evaluation of pairs was not possible because while pairs of drugs are commonly prescribed as intervention, each particular pair of drugs is a rare event, and accurately evaluating CATE estimation performance (for a rare outcome such as Pancytopenia) requires amassing a natural experiment with at least several thousand patients who received the same intervention.

### C.2.2 LINCS.

The goal in selecting holdout interventions for the meta-validation and meta-testing sets was to ensure that they consisted of both cell lines and tasks (small molecules) that had not been seen previously at the time of training (*i.e.* zero-shot on cell lines and tasks).

Using a random data splitting approach would result in large portions (up to 50%) of the data being unused to comply with the zero-shot requirements on cell lines and tasks. One approach to tackle this was to reserve only those tasks in the held-out sets which had been tested on the fewest cell lines. This preserved the maximum amount of data but resulted in an average of just 1 cell line per task in the meta-testing and meta-validation sets, which would not be fair to the non-zero shot baselines.

To address these issues, we designed a new data split procedure that exploits the structure of how tasks and cell lines are paired. To do so, We first clustered tasks by the cell lines they are tested on. We then identified a set of 600 drugs that had all been tested on a shared set of roughly 20 cell lines. We divided the cell lines and tasks within this set into the meta-validation and meta-testing set, while enforcing zero-shot constraints on both. This resulted in roughly 10 cell lines per intervention in both

the meta-validation and meta-testing sets, while still maintaining a reasonably large size of 11 distinct cell lines and 300 distinct tasks in both sets. All remaining tasks and cell lines were reserved for the training set. (See Table 8)

### C.3 Understanding CaML’s performance

Our comparison to CATE estimators which are restricted to single interventions (Grey, Table 2B.3) shows that a key reason for CaML’s strong performance is the ability to jointly learn across from many intervention datasets, in order to generalize to unseen intervention.

Additionally, in both the Claims and LINCBS settings, we conduct two key ablation studies to further understand the underlying reason for CaML’s strong performance results.

In our first ablation experiment (w/o meta-learning), we trained the CaML model without employing meta-learning, instead using the standard empirical risk minimization (ERM) technique [73]. This can be seen as a specific implementation of the CaML algorithm (refer to Algorithm 1) when  $k = 1$  [52]. The results of this experiment showed a varying degree of performance deterioration across our primary tests. In the Claims settings, we observed a decrease in the RATE performance metric by 15%-22% (refer to Table 2), while in the LINCBS settings, the PEHE performance metric decreased by approximately 0.01 (see Table 3). These results indicate that the absence of meta-learning affects the model’s performance, although the impact varies depending on the specific setting. An important detail to consider is that the Claims data experiments dealt with substantially larger datasets, each comprising hundreds of thousands of patients per intervention. This extensive scale of data potentially amplifies the benefits of using meta-learning in the CaML model for the Claims dataset. The larger dataset enables the model to adapt to a given task over a larger set of iterations without reusing the same data, thereby enhancing the efficacy of meta-learning.

Our second ablation (w/o RA-learner) assesses the sensitivity of CaML’s performance to different pseudo-outcome estimation strategies. A key aspect of CaML is *flexibility* in choice of any pseudo-outcome estimator to infer CATE, in contrast to prior work which uses specific CATE estimation strategies [23, 33]. We find that CaML performance benefits strongly from flexibility of pseudo-outcome estimator choice. We assess this by using an alternative pseudo-outcome estimator. Firstly, we find that this ablation results in much noisier model training. For instance, the standard deviation in RATE across the 8 random seeds increases by  $20\times$  when using the alternative pseudo-outcome estimator in the claims setting. Moreover, the alternative pseudo-outcome estimator typically worsens performance, decreasing RATE by up to 6% in the Claims setting, and increasing PEHE by 20%-21% in the LINCBS setting (Table 3). We note that this ablation performs slightly better at the 0.99 threshold, which may be a result of the high variance in this ablation. Specific choice of alternative pseudo-outcome estimator for this ablation varies by setting. We use the R-learner [53] for Claims as it also achieves strong single task performance (Table 2, grey) on Claims data. However, R-learner is restricted to single-dimensional outcomes, and thus for LINCBS (in which outcomes are 50 and 20 dimensional), we use the PW-learner instead [14].

### C.4 Hyperparameter space

#### C.4.1 Claims dataset hyperparameter space

We list the hyperparameter search spaces for the medical claims dataset in the following tables. Table 9 represents the search space for CaML. The SIN baseline consists of two stages, Stage 1 and Stage 2. For the Stage 1 model, we searched the identical hyperparameter search space as for CaML (Table 9). For Stage 2, we used the hyperparameters displayed in Table 10. The search space for the GraphITE baseline is displayed in Table 11. For the S-learner and T-learner w/ meta-learning baselines, we use the same hyperparameter space as for CaML (Table 9) with the only major difference that these baselines predicts the outcome  $Y$  instead of  $\hat{\tau}$ . For all deep learning-based methods, we employed a batch size of 8,192, except for GraphITE, where we were restricted to using a batch size of 512 due to larger memory requirements. Single-task neural network baselines (FlexTENet, TARNet, and DragonNet) are shown in Tables 12, 13, and 14, respectively. For the remaining baselines, i.e., the model-agnostic CATE estimators, the (shared) hyperparameter search space is shown in Table 15. Finally, applied L1 regularization to the encoder layer of the customizable neural network models (that were not reused as external packages), i.e., SIN learner, GraphITE, T-learner w/ meta-learning, and S-learner w/ meta-learning, and CaML.

## 1016 C.4.2 LINCS hyperparameter space

1017 We list the hyperparameter search spaces for LINCS in the following tables. CaML is shown in Table 16.  
 1018 SIN Stage 1 used the same search space as CaML (Table 16). The search space of SIN Stage 2 is shown  
 1019 in Table 17. S learner and T-learner w/ meta-learning used the same search space as CaML. The search  
 1020 space of GraphITE is shown in Table 18. All methods that were applied to LINCS used a batch size of 20.

## 1021 C.5 More details on intervention information

1022 Here we give more details about the intervention information used for the medical claims dataset.  
 1023 In order to perform zero-shot generalization, we acquired information about a specific intervention  
 1024 through the use of pretrained embeddings. We generated these embeddings on the Precision Medicine  
 1025 Knowledge Graph [7] that contains drug nodes as well as 9 other node types. We extracted embeddings  
 1026 for 7957 drugs from the knowledge graph.

1027 To extract rich neighborhood information from the knowledge graph we used Stargraph [47], which  
 1028 is a coarse-to-fine representation learning algorithm. StarGraph generates a subgraph for each node  
 1029 by sampling from its neighbor nodes (all nodes in the one-hop neighborhood) and anchor nodes (a  
 1030 preselected subset of nodes appearing in the multihop neighborhood). In our case the anchor nodes  
 1031 were the 2% of graph nodes with the highest degree. For the scoring function we used the augmented  
 1032 version of TripleRE [85] presented in the StarGraph article [47].

1033 We performed a hyperparameter optimization to compare different models and determine the one  
 1034 we used to calculate our final embeddings (see Table C.5). The hyperparameter search was random  
 1035 with the objective of minimizing the loss function used in training on held out data. The search range  
 1036 for each of the parameters is displayed in C.5. Since certain parameters did not seem to influence the  
 1037 final score as much we decided to use them as constants and focus on optimizing the hyperparameters  
 1038 in the table. Therefore the number of sampled anchors was set to 20 and  $u = 0.1$  in the augmented  
 1039 TripleRE function, the values matching those seen in Stargraph [46].

1040 Our final embeddings were 256-dimensional, the learning rate was  $2e-4$ , the drop-ratio was  $5e-3$ . We  
 1041 used the self-adversarial negative sampling loss with  $\gamma = 8$  and we sampled 4 neighbor nodes for each  
 1042 subgraph.

1043 To additionally evaluate the quality of the embeddings we assigned classes to drug combinations  
 1044 and then scored them using multiple clustering metrics. We were interested to see if embeddings  
 1045 of drug combinations used for similar purposes would be embedded closer together than other drug  
 1046 combinations. For the class label of single drugs we used the first level of the Anatomical Therapeutic  
 1047 Chemical (ATC) code, which represents one of the 14 anatomical or pharmacological groups. Since  
 1048 certain medications have more than one ATC code, we took the mode of all labels for a specific drug.  
 1049 For multiple drugs we combined all distinct first level values and took the mode of them as the label. We  
 1050 used the Silhouette metric, Calinski Harabasz index and Davies Bouldin index as well as the average  
 1051 classification accuracy over 10 runs of training a random forest classifier on a random sample of 80%  
 1052 of the dataset and evaluating on the remaining 20%. Out of all tested embeddings the hyperparameter  
 1053 optimized StarGraph embeddings performed best (exceeding 93% in the classification accuracy metric).

## 1054 C.6 Pseudo-outcome estimation

1055 In our experiments, we estimate pseudo-outcomes  $\tilde{\tau}$  for a given intervention  $w$  using the  
 1056 RA-learner [14]:

$$\tilde{\tau} = W(Y - \hat{\mu}_0(X)) + (1 - W)(\hat{\mu}_1(X) - Y) \quad (18)$$

1057 where  $\hat{\mu}_w$  is an estimate of  $\mu_w(X) = \mathbb{E}_{\mathcal{P}}[Y | X = x, W = w]$ .

1058 Furthermore, in both settings we only estimate CATE for treated individuals. We focus on treated  
 1059 individuals in the Claims setting because we care about the risk of an adverse event for prescribing  
 1060 a sick patients drugs that may cure their sickness, not the adverse event risk of prescribing healthy  
 1061 patients drugs (which is of less clinical interest). In the LINCS setting, we focus on treated cells as  
 1062 for these cell-lines  $Y(0)$  is also measured from a cloned cell-line under similar laboratory conditions,  
 1063 which allows us to directly estimate CATE prediction performance using the PEHE metric. As we  
 1064 focus on treated samples, the RA-learner can be simplified to  $\tilde{\tau} = Y - \hat{\mu}_0(X)$ . We estimate  $\hat{\mu}_0(X)$

1065 using a random forest model in the Claims setting, whereas in the LINCS setting we use the point  
 1066 estimate from the untreated control cell line’s gene expression.

## 1067 C.7 Baselines

1068 Here we provide more details on the baselines used in our experiments.

1069 *Trained on test task:* These baselines leverage CATE estimators which can only be trained on a single  
 1070 task (typically these are the strongest baselines, when there is a large enough dataset for a single task).  
 1071 Thus, we train a single model for each meta-testing task on its train split, and evaluate performance  
 1072 on its test split. We use a number of strong baselines for CATE estimation developed by prior work  
 1073 including both model-agnostic and end-to-end deep learning approaches: T-learner. Specifically,  
 1074 we use the model-agnostic CATE estimators: [42], X-learner [42], RA-learner [14], R-learner [53].  
 1075 We additionally use the end-to-end deep learning estimators DragonNet [68], TARNet [66], and  
 1076 FlexTENet [15], using implementations from [15]. For model-agnostic CATE estimators, we use  
 1077 random forest models following prior work [12, 76].

1078 *Zero-shot.* These baselines use CATE estimators which incorporate intervention information ( $W$ ) and  
 1079 are capable of multi-task learning. We train these baselines on all meta-training tasks. These baselines  
 1080 have no access to the meta-testing tasks during training. We found in preliminary experiments that  
 1081 in some cases, baseline models trained with vanilla ERM would not even converge. To allow for  
 1082 fair comparison to baselines, we allow for all zero-shot baselines to be trained using Reptile (by  
 1083 training using the same optimization strategy as Algorithm 1, while allowing for training with ERM  
 1084 by including  $k = 1$  in the hyperparameter search space).

1085 Firstly, we use GraphITE [23] and Structured Intervention Networks [33]. These are, to the best  
 1086 of our knowledge, the only methods from prior work which are (in principle) capable of zero-shot  
 1087 generalization. We use existing implementations provided by the authors [33].

1088 Additionally, we implement two strong baselines which estimate CATE by modeling potential  
 1089 outcomes, rather than via pseudo-outcomes. These are variants of the S-learner and T-learner [42] with  
 1090 meta-learning, which use the intervention information as input, rather than one-hot encoded vectors of  
 1091 the different interventions—such that they also have zero-shot capability. Specifically, we train MLPs  
 1092 using the same architecture as CaML to estimate the response function from observed outcomes:

$$\mu(x, w) = \mathbb{E}_{\mathcal{P}} \left[ Y \mid X = x, W = w \right] \quad (19)$$

1093 and estimate CATE by

$$\hat{\tau}_w(x) = \hat{\mu}(x, w) - \hat{\mu}(x, \mathbf{0}) \quad (20)$$

1094 Where  $w$  denotes the corresponding intervention information  $w$  for an intervention, and  $\mathbf{0}$  denotes  
 1095 a null intervention vector. In the LINCS setting, we represent  $\mathbf{0}$  as a vector of zeros, whereas in the  
 1096 Claims setting we represent  $\mathbf{0}$  as the mean embedding of all drugs (as the estimand is the increase in  
 1097 adverse event likelihood compared to a randomly chosen drug). The difference between the T-learner  
 1098 and the S-learner is that the T-learner estimates two models, one for control units and one for treated  
 1099 units. By contrast, the S-learner estimates a shared model across all units.



|                            | RATE @ $u$ ( $\uparrow$ )          |                                    |                                    | Recall @ $u$ ( $\uparrow$ ) |                                    |                                    | Precision @ $u$ ( $\uparrow$ )     |                                    |                                    |
|----------------------------|------------------------------------|------------------------------------|------------------------------------|-----------------------------|------------------------------------|------------------------------------|------------------------------------|------------------------------------|------------------------------------|
|                            | 0.999                              | .998                               | 0.995                              | 0.99                        | 0.999                              | 0.998                              | 0.995                              | 0.99                               | 0.99                               |
| Random                     | $0.00 \pm <0.001$                  | $0.00 \pm <0.001$                  | $0.00 \pm <0.001$                  | $0.00 \pm <0.001$           | $0.00 \pm <0.001$                  | $0.00 \pm <0.001$                  | $0.00 \pm <0.001$                  | $0.00 \pm <0.001$                  | $0.00 \pm <0.001$                  |
| T-learner                  | $0.32 \pm <0.001$                  | $0.26 \pm <0.001$                  | $0.16 \pm <0.001$                  | $0.10 \pm <0.001$           | $0.12 \pm <0.001$                  | $0.18 \pm <0.001$                  | $0.29 \pm <0.001$                  | $0.18 \pm <0.001$                  | $0.11 \pm <0.001$                  |
| X-learner                  | $0.06 \pm <0.001$                  | $0.05 \pm <0.001$                  | $0.04 \pm <0.001$                  | $0.03 \pm <0.001$           | $0.02 \pm <0.001$                  | $0.04 \pm <0.001$                  | $0.07 \pm <0.001$                  | $0.06 \pm <0.001$                  | $0.05 \pm <0.001$                  |
| R-learner                  | $0.19 \pm <0.001$                  | $0.17 \pm <0.001$                  | $0.12 \pm <0.001$                  | $0.08 \pm <0.001$           | $0.06 \pm <0.001$                  | $0.10 \pm <0.001$                  | $0.21 \pm <0.001$                  | $0.15 \pm <0.001$                  | $0.11 \pm <0.001$                  |
| RA-learner                 | $0.47 \pm 0.001$                   | $0.37 \pm <0.001$                  | $0.23 \pm <0.001$                  | $0.14 \pm <0.001$           | $0.17 \pm <0.001$                  | $0.26 \pm <0.001$                  | $0.42 \pm <0.001$                  | $0.26 \pm <0.001$                  | $0.16 \pm <0.001$                  |
| DragonNet                  | $0.09 \pm 0.037$                   | $0.07 \pm 0.030$                   | $0.05 \pm 0.019$                   | $0.04 \pm 0.013$            | $0.02 \pm 0.008$                   | $0.04 \pm 0.012$                   | $0.07 \pm 0.020$                   | $0.10 \pm 0.036$                   | $0.05 \pm 0.015$                   |
| TARNet                     | $0.15 \pm 0.011$                   | $0.12 \pm 0.011$                   | $0.07 \pm 0.006$                   | $0.05 \pm 0.004$            | $0.05 \pm 0.003$                   | $0.08 \pm 0.006$                   | $0.12 \pm 0.008$                   | $0.15 \pm 0.012$                   | $0.09 \pm 0.007$                   |
| FlexTENet                  | $0.10 \pm 0.015$                   | $0.09 \pm 0.016$                   | $0.06 \pm 0.008$                   | $0.04 \pm 0.006$            | $0.04 \pm 0.006$                   | $0.07 \pm 0.009$                   | $0.12 \pm 0.011$                   | $0.08 \pm 0.010$                   | $0.06 \pm 0.004$                   |
| GraphITE                   | $0.19 \pm 0.024$                   | $0.12 \pm 0.013$                   | $0.05 \pm 0.004$                   | $0.03 \pm 0.002$            | $0.07 \pm 0.009$                   | $0.08 \pm 0.010$                   | $0.09 \pm 0.008$                   | $0.14 \pm 0.015$                   | $0.07 \pm 0.005$                   |
| SIN                        | $0.00 \pm 0.002$                   | $0.00 \pm 0.001$                   | $0.00 \pm 0.001$                   | $0.00 \pm 0.001$            | $0.00 \pm 0.001$                   | $0.00 \pm 0.001$                   | $0.01 \pm 0.001$                   | $0.01 \pm 0.001$                   | $0.01 \pm 0.001$                   |
| S-learner w/ meta-learning | $0.21 \pm 0.032$                   | $0.16 \pm 0.028$                   | $0.09 \pm 0.020$                   | $0.05 \pm 0.012$            | $0.08 \pm 0.013$                   | $0.11 \pm 0.022$                   | $0.15 \pm 0.035$                   | $0.18 \pm 0.031$                   | $0.10 \pm 0.023$                   |
| T-learner w/ meta-learning | $0.40 \pm 0.012$                   | $0.31 \pm 0.010$                   | $0.18 \pm 0.007$                   | $0.11 \pm 0.004$            | $0.15 \pm 0.006$                   | $0.22 \pm 0.008$                   | $0.32 \pm 0.013$                   | $0.35 \pm 0.011$                   | $0.21 \pm 0.008$                   |
| CaML - w/o meta-learning   | $0.39 \pm 0.012$                   | $0.31 \pm 0.006$                   | $0.18 \pm 0.008$                   | $0.11 \pm 0.006$            | $0.15 \pm 0.005$                   | $0.22 \pm 0.007$                   | $0.32 \pm 0.014$                   | $0.35 \pm 0.006$                   | $0.22 \pm 0.008$                   |
| CaML - w/o RA-learner      | $0.45 \pm 0.058$                   | $0.36 \pm 0.066$                   | $0.22 \pm 0.067$                   | $0.14 \pm 0.041$            | $0.16 \pm 0.020$                   | $0.24 \pm 0.019$                   | $0.35 \pm 0.016$                   | $0.41 \pm 0.082$                   | $0.26 \pm 0.078$                   |
| CaML (ours)                | <b><math>0.48 \pm 0.010</math></b> | <b><math>0.38 \pm 0.007</math></b> | <b><math>0.23 \pm 0.003</math></b> | $0.13 \pm 0.002$            | <b><math>0.18 \pm 0.004</math></b> | <b><math>0.27 \pm 0.005</math></b> | <b><math>0.38 \pm 0.006</math></b> | <b><math>0.43 \pm 0.008</math></b> | <b><math>0.16 \pm 0.003</math></b> |

Table 4: Performance results for the Claims dataset (predicting pancytopenia onset from drug exposure using patient medical history. This table extends Table 2 with standard deviations.



|                            | RATE @ $u$ ( $\uparrow$ ) |                    |                    | Recall @ $u$ ( $\uparrow$ ) |                    |                    | Precision @ $u$ ( $\uparrow$ ) |                    |                    |
|----------------------------|---------------------------|--------------------|--------------------|-----------------------------|--------------------|--------------------|--------------------------------|--------------------|--------------------|
|                            | 0.999                     | .998               | 0.995              | 0.99                        | 0.999              | 0.998              | 0.995                          | 0.99               | 0.999              |
| Random                     | 0.00±<0.001               | 0.00±<0.001        | 0.00±<0.001        | 0.00±<0.001                 | 0.05±<0.001        | 0.07±<0.001        | 0.01±<0.001                    | 0.01±<0.001        | 0.01±<0.0014       |
| T-learner                  | 0.10±<0.001               | 0.07±<0.001        | 0.05±<0.001        | 0.04±<0.001                 | 0.05±<0.001        | 0.07±<0.001        | 0.11±<0.001                    | 0.13±<0.001        | 0.10±<0.001        |
| X-learner                  | 0.00±<0.001               | -0.01±<0.001       | 0.00±<0.001        | 0.00±<0.001                 | 0.00±<0.001        | 0.00±<0.001        | 0.01±<0.001                    | 0.02±<0.001        | 0.00±<0.001        |
| R-learner                  | -0.01±<0.001              | -0.01±<0.001       | -0.01±<0.001       | 0.00±<0.001                 | 0.00±<0.001        | 0.00±<0.001        | 0.00±<0.001                    | 0.04±<0.001        | 0.00±<0.001        |
| RA-learner                 | 0.28±<0.001               | 0.26±<0.001        | 0.17±<0.001        | 0.10±<0.001                 | 0.10±<0.001        | 0.19±<0.001        | 0.30±<0.001                    | 0.37±<0.001        | 0.30±<0.001        |
| DragonNet                  | -0.01±0.002               | 0.00±0.009         | 0.00±0.004         | 0.00±0.003                  | 0.00±<0.001        | 0.00±0.003         | 0.00±0.005                     | 0.01±0.009         | 0.00±<0.001        |
| TARNet                     | 0.04±0.046                | 0.03±0.030         | 0.02±0.013         | 0.02±0.012                  | 0.01±0.011         | 0.02±0.015         | 0.04±0.013                     | 0.06±0.029         | 0.05±0.046         |
| FlexTENet                  | 0.02±0.024                | 0.02±0.019         | 0.04±0.012         | 0.03±0.013                  | 0.01±0.009         | 0.03±0.018         | 0.08±0.012                     | 0.12±0.037         | 0.02±0.027         |
| S-learner w/ meta-learning | 0.27±0.173                | 0.16±0.118         | 0.08±0.052         | 0.04±0.030                  | 0.09±0.055         | 0.10±0.070         | 0.13±0.084                     | 0.15±0.090         | 0.29±0.180         |
| T-learner w/ meta-learning | 0.27±0.173                | 0.16±0.118         | 0.08±0.052         | 0.04±0.030                  | 0.09±0.055         | 0.10±0.070         | 0.13±0.084                     | 0.15±0.090         | 0.29±0.180         |
| GraphITE                   | 0.25±0.088                | 0.15±0.054         | 0.06±0.025         | 0.03±0.011                  | 0.08±0.024         | 0.10±0.034         | 0.11±0.045                     | 0.13±0.049         | 0.27±0.091         |
| SIN                        | 0.00±0.008                | 0.00±0.014         | 0.00±0.008         | 0.00±0.005                  | 0.00±0.005         | 0.00±0.008         | 0.02±0.015                     | 0.03±0.009         | 0.00±0.007         |
| CaML - w/o meta-learning   | 0.45±0.070                | <b>0.38</b> ±0.057 | 0.21±0.017         | 0.13±0.008                  | 0.19±0.019         | 0.28±0.026         | 0.38±0.025                     | 0.45±0.019         | 0.49±0.070         |
| CaML - w/o RA-learner      | 0.40±0.101                | 0.33±0.034         | <b>0.24</b> ±0.014 | 0.15±0.010                  | 0.18±0.025         | 0.28±0.010         | 0.42±0.024                     | 0.50±0.028         | 0.44±0.099         |
| CaML (ours)                | <b>0.47</b> ±0.084        | 0.37±0.044         | 0.23±0.022         | <b>0.15</b> ±0.013          | <b>0.20</b> ±0.015 | <b>0.30</b> ±0.016 | <b>0.43</b> ±0.024             | <b>0.51</b> ±0.027 | <b>0.51</b> ±0.079 |

Table 5: Performance results for the medical claims dataset, in which the task is to predict the effect of a *pair* of drugs the drug on pancytopenia occurrence. Mean and standard deviation between runs is reported. Single-task methods were trained on the meta-testing tasks (best model underlined). Methods that were capable of training across multiple tasks were trained on meta-training tasks and applied to previously unseen meta-testing tasks (best model in bold). CaML outperforms the strongest baseline that had access to testing tasks on 12 out of 12 metrics, and outperforms all zero-shot baselines. Notably, due to the small sample size for natural experiments with combinations of drugs, *the RATE estimation process is very noisy* which is reflected in high variability of the measured RATE. Here, the secondary metrics (Recall and Precision) that are not affected, additionally assert the dominance of CaML over all baselines.

|                    | Split | # of Patients |
|--------------------|-------|---------------|
| Allopurinol        | Test  | 815,921       |
| Pregabalin         | Test  | 636,995       |
| Mirtazapine        | Test  | 623,980       |
| Indomethacin       | Test  | 560,380       |
| Colchicine         | Test  | 370,397       |
| Hydralazine        | Test  | 363,070       |
| Hydroxychloroquine | Test  | 324,750       |
| Methotrexate       | Test  | 323,387       |
| Memantine          | Test  | 306,832       |
| Fentanyl           | Test  | 261,000       |
| Etodolac           | Val   | 438,854       |
| Azathioprine       | Val   | 100,000       |

Table 6: Held-out test and validation drugs for our single-drug meta-testing and meta-validation datasets for our Claims evaluation in Table 2. Drugs are unseen (excluded) during training. All drugs are known to cause pancytopenia [40]

|                                   | Split | # of Patients |
|-----------------------------------|-------|---------------|
| Allopurinol + Hydralazine         | Test  | 7,859         |
| Methotrexate + Hydroxychloroquine | Test  | 25,716        |
| Pregabalin + Fentanyl             | Test  | 5,424         |
| Indomethacin + Colchicine         | Test  | 42,846        |
| Mirtazapine + Memantine           | Test  | 10,215        |

Table 7: Held-out test pairs of drugs for our meta-testing and meta-validation datasets in Appendix Table B.3. Both drugs are unseen (excluded) during training. All drugs are known to cause pancytopenia [40]

| Split           | # Perturbagens | # Cell-Lines | Mean #Cell Lines/Task |
|-----------------|----------------|--------------|-----------------------|
| Meta-training   | 9717           | 77           | 5.79                  |
| Meta-validation | 304            | 11           | 9.99                  |
| Meta-testing    | 301            | 11           | 10.77                 |

Table 8: Composition of the meta-training, meta-validation and meta-testing sets for the LINCS dataset. No cell lines or drugs (tasks) were shared across any of the splits.

| Hyperparameter                | Search range                                                                 |
|-------------------------------|------------------------------------------------------------------------------|
| Num. of layers                | {2,4,6}                                                                      |
| Dim. of hidden layers         | {128,256}                                                                    |
| Dropout                       | {0,0.1}                                                                      |
| Learning rate                 | $\{3 \times 10^{-3}, 1 \times 10^{-3}, 3 \times 10^{-4}, 1 \times 10^{-4}\}$ |
| Meta learning rate            | {1}                                                                          |
| Weight decay                  | $\{5 \times 10^{-3}\}$                                                       |
| Reptile k                     | {1,10,50}                                                                    |
| L1 regularization coefficient | $\{0, 1 \times 10^{-7}, 5 \times 10^{-7}\}$                                  |

Table 9: Hyperparameter search space for **CaML** (our proposed method) on the medical claims dataset.

| Hyperparameter                   | Search range                                                                 |
|----------------------------------|------------------------------------------------------------------------------|
| Num. of como layers              | {2,4,6}                                                                      |
| Num. of covariate layers         | {2,4,6}                                                                      |
| Num. of propensity layers        | {2,4,6}                                                                      |
| Num. of treatment layers         | {2,4,6}                                                                      |
| Dim. of hidden como layers       | {128,256}                                                                    |
| Dim. of hidden covariate layers  | {128,256}                                                                    |
| Dim. of hidden treatment layers  | {128,256}                                                                    |
| Dim. of hidden propensity layers | {16,32,64,128}                                                               |
| Dropout                          | {0,0.1}                                                                      |
| Learning rate                    | $\{3 \times 10^{-3}, 1 \times 10^{-3}, 3 \times 10^{-4}, 1 \times 10^{-4}\}$ |
| Meta learning rate               | {1}                                                                          |
| Sin Weight decay                 | $\{0.5 \times 10^{-3}\}$                                                     |
| Pro Weight decay                 | $\{0.5 \times 10^{-3}\}$                                                     |
| GNN Weight decay                 | $\{0.5 \times 10^{-3}\}$                                                     |
| Reptile k                        | {1,10,50}                                                                    |
| L1 regularization coefficient    | $\{0, 1 \times 10^{-7}, 5 \times 10^{-7}\}$                                  |

Table 10: Hyperparameter search space for **SIN** on the medical claims dataset. The SIN model consists of two stages, Stage 1 and Stage 2. For the Stage 1 model we searched the identical hyperparameter search space as for CaML (Table 9). For Stage 2, we used the hyperparameters shown in this table.

| Hyperparameter                          | Search range                                                                 |
|-----------------------------------------|------------------------------------------------------------------------------|
| Num. of covariate layers                | {2,4,6}                                                                      |
| Num. of treatment layers                | {2,4,6}                                                                      |
| Dim. of hidden treatment layers         | {128,256}                                                                    |
| Dim. of hidden covariate layers         | {128,256}                                                                    |
| Dropout                                 | {0,0.1}                                                                      |
| Independence regularization coefficient | {0,0.01,0.1,1.0}                                                             |
| Learning rate                           | $\{3 \times 10^{-3}, 1 \times 10^{-3}, 3 \times 10^{-4}, 1 \times 10^{-4}\}$ |
| Meta learning rate                      | {1}                                                                          |
| Weight decay                            | $\{5 \times 10^{-3}\}$                                                       |
| Reptile k                               | {1,10,50}                                                                    |
| L1 regularization coefficient           | $\{0, 1 \times 10^{-7}, 5 \times 10^{-7}\}$                                  |

Table 11: Hyperparameter search space for **GraphITE** on the medical claims dataset.

| Hyperparameter     | Search range                                                                 |
|--------------------|------------------------------------------------------------------------------|
| Num. of out layers | {1,2,4}                                                                      |
| Num. of r layers   | {2,4,6}                                                                      |
| Num. units p out   | {32,64,128,256}                                                              |
| Num. units s out   | {32,64,128,256}                                                              |
| Num. units s r     | {32,64,128,256}                                                              |
| Num. units p r     | {32,64,128,256}                                                              |
| Weight decay       | $\{5 \times 10^{-3}\}$                                                       |
| Orthogonal penalty | $\{0, 1 \times 10^{-5}, 1 \times 10^{-3}, 0.1\}$                             |
| Private out        | {True, False}                                                                |
| Learning rate      | $\{3 \times 10^{-3}, 1 \times 10^{-3}, 3 \times 10^{-4}, 1 \times 10^{-4}\}$ |

Table 12: Hyperparameter search space for **FlexTENet** on the medical claims dataset.

| Hyperparameter     | Search range                                                                 |
|--------------------|------------------------------------------------------------------------------|
| Num. of out layers | $\{1,2,4\}$                                                                  |
| Num. of r layers   | $\{2,4,6\}$                                                                  |
| Num. units out     | $\{128,256\}$                                                                |
| Weight decay       | $\{5 \times 10^{-3}\}$                                                       |
| Penalty disc       | $\{0, 1 \times 10^{-3}\}$                                                    |
| Learning rate      | $\{3 \times 10^{-3}, 1 \times 10^{-3}, 3 \times 10^{-4}, 1 \times 10^{-4}\}$ |

Table 13: Hyperparameter search space for **TARNet** on the medical claims dataset.

| Hyperparameter     | Search range                                                                 |
|--------------------|------------------------------------------------------------------------------|
| Num. of out layers | $\{1,2,4\}$                                                                  |
| Num. of r layers   | $\{2,4,6\}$                                                                  |
| Num. units r       | $\{128,256\}$                                                                |
| Num. units out     | $\{128,256\}$                                                                |
| Weight decay       | $\{5 \times 10^{-3}\}$                                                       |
| Learning rate      | $\{3 \times 10^{-3}, 1 \times 10^{-3}, 3 \times 10^{-4}, 1 \times 10^{-4}\}$ |

Table 14: Hyperparameter search space for **DragonNet** on the medical claims dataset.

| Hyperparameter     | Search range                               |
|--------------------|--------------------------------------------|
| Num. of estimators | $[50,250]$                                 |
| Max depth          | $[10,50]$                                  |
| Min sample split   | $[2,8]$                                    |
| Criterion regress  | $\{\text{squared error, absolute error}\}$ |
| Criterion binary   | $\{\text{gini, entropy}\}$                 |
| Max features       | $\{\text{sqrt, log2, auto}\}$              |

Table 15: Hyperparameter search space for model-agnostic CATE estimators, i.e., **R-learner**, **X-learner**, **RA-learner**, and **T-learner** on the medical claims dataset.

| Hyperparameter                | Search range                                                                 |
|-------------------------------|------------------------------------------------------------------------------|
| Num. of layers                | $\{2,4,6\}$                                                                  |
| Dim. of hidden layers         | $\{512,1024\}$                                                               |
| Dropout                       | $\{0,0.1\}$                                                                  |
| Learning rate                 | $\{3 \times 10^{-3}, 1 \times 10^{-3}, 3 \times 10^{-4}, 1 \times 10^{-4}\}$ |
| Meta learning rate            | $\{0.1,0.5,0.9\}$                                                            |
| Weight decay                  | $\{0.1\}$                                                                    |
| Reptile k                     | $\{1,2,3\}$                                                                  |
| L1 regularization coefficient | $\{0, 1 \times 10^{-7}, 5 \times 10^{-7}\}$                                  |

Table 16: Hyperparameter search space for **CaML** (our proposed method) on the LINCS dataset.

| Hyperparameter                   | Search range                                                                 |
|----------------------------------|------------------------------------------------------------------------------|
| Num. of como layers              | {2,4,6}                                                                      |
| Num. of covariates layers        | {2,4,6}                                                                      |
| Num. of propensity layers        | {2,4,6}                                                                      |
| Num. of treatment layers         | {2,4,6}                                                                      |
| Dim. output                      | {128,256}                                                                    |
| Dim. of hidden treatment layers  | {128,256}                                                                    |
| Dim. of hidden covariate layers  | {128,256}                                                                    |
| Dim. of hidden como layers       | {128,256}                                                                    |
| Dim. of hidden propensity layers | {16,32,64,128}                                                               |
| Model dim.                       | {512,1024}                                                                   |
| Dropout                          | {0,0.1}                                                                      |
| Learning rate                    | $\{3 \times 10^{-3}, 1 \times 10^{-3}, 3 \times 10^{-4}, 1 \times 10^{-4}\}$ |
| Meta learning rate               | {0.1,0.5,0.9}                                                                |
| Sin weight decay                 | {0.0,0.005}                                                                  |
| Pro weight decay                 | {0.0,0.005}                                                                  |
| GNN weight decay                 | {0.0,0.005}                                                                  |
| Weight decay                     | {0.1}                                                                        |
| Reptile k                        | {1,2,3}                                                                      |
| L1 regularization coefficient    | $\{0, 1 \times 10^{-7}, 5 \times 10^{-7}\}$                                  |

Table 17: Hyperparameter search space for the **SIN** baseline on the LINC dataset.

| Hyperparameter                          | Search range                                                                 |
|-----------------------------------------|------------------------------------------------------------------------------|
| Num. of covariate layers                | {2,4,6}                                                                      |
| Num. of treatment layers                | {2,4,6}                                                                      |
| Num. of layers                          | {2,4,6}                                                                      |
| Dim. of hidden covariate layers         | {128,256}                                                                    |
| Independence regularization coefficient | {0,0.01,0.1,1.0}                                                             |
| Dropout                                 | {0,0.1}                                                                      |
| Model dim.                              | {512,1024}                                                                   |
| Learning rate                           | $\{3 \times 10^{-3}, 1 \times 10^{-3}, 3 \times 10^{-4}, 1 \times 10^{-4}\}$ |
| Meta learning rate                      | {0.1,0.5,0.9}                                                                |
| Weight decay                            | {0.1}                                                                        |
| Reptile k                               | {1,2,3}                                                                      |
| L1 regularization coefficient           | $\{0, 1 \times 10^{-7}, 5 \times 10^{-7}\}$                                  |

Table 18: Hyperparameter search space for the **GraphITE** baseline on the LINC dataset.

| Hyperparameter            | Search range          |
|---------------------------|-----------------------|
| Dropout                   | [1e-4,1e-1]           |
| Learning rate             | [1e-5,1e-3]           |
| Weight decay              | [1e-5,1e-2]           |
| Adversarial temperature   | [1,10]                |
| Gamma                     | [0,30]                |
| Num. of sampled neighbors | 0-10                  |
| Dim. of hidden layers     | { 64, 128, 256, 512 } |

Table 19: The hyperparameter optimization search ranges used in the selection of the optimal model for the generation of knowledge graph node embeddings that would serve as intervention information for the medical claims dataset.

## References

- [1] Ahmed M Alaa and Mihaela Van Der Schaar. Bayesian inference of individualized treatment effects using multi-task gaussian processes. *Advances in neural information processing systems*, 30, 2017.
- [2] Susan Athey and Guido Imbens. Recursive partitioning for heterogeneous causal effects. *Proceedings of the National Academy of Sciences*, 113(27):7353–7360, 2016.
- [3] Yoshua Bengio, Samy Bengio, and Jocelyn Cloutier. *Learning a synaptic learning rule*. Citeseer, 1990.
- [4] Ioana Bica, Ahmed M Alaa, Craig Lambert, and Mihaela Van Der Schaar. From real-world patient data to individualized treatment effects using machine learning: current and future methods to address underlying challenges. *Clinical Pharmacology & Therapeutics*, 109(1):87–100, 2021.
- [5] Stéphane Boucheron, Gábor Lugosi, and Pascal Massart. *Concentration inequalities: A nonasymptotic theory of independence*. Oxford university press, 2013.
- [6] Olivier Bousquet. A bennett concentration inequality and its application to suprema of empirical processes. *Comptes Rendus Mathématique*, 334(6):495–500, 2002.
- [7] Payal Chandak, Kexin Huang, and Marinka Zitnik. Building a knowledge graph to enable precision medicine. *bioRxiv*, 2022.
- [8] Hong-Bin Chen, Sinho Chewi, and Jonathan Niles-Weed. Dimension-free log-sobolev inequalities for mixture distributions. *Journal of Functional Analysis*, 281(11):109236, 2021.
- [9] Victor Chernozhukov, Denis Chetverikov, Mert Demirer, Esther Duflo, Christian Hansen, Whitney Newey, and James Robins. Double/debiased machine learning for treatment and structural parameters, 2018.
- [10] Victor Chernozhukov, Mert Demirer, Esther Duflo, and Ivan Fernandez-Val. Generic machine learning inference on heterogeneous treatment effects in randomized experiments, with an application to immunization in india. Technical report, National Bureau of Economic Research, 2018.
- [11] Richard K Crump, V Joseph Hotz, Guido W Imbens, and Oscar A Mitnik. Nonparametric tests for treatment effect heterogeneity. *The Review of Economics and Statistics*, 90(3):389–405, 2008.
- [12] Alicia Curth, David Svensson, Jim Weatherall, and Mihaela van der Schaar. Really doing great at estimating cate? a critical look at ml benchmarking practices in treatment effect estimation. In *Thirty-fifth Conference on Neural Information Processing Systems Datasets and Benchmarks Track (Round 2)*, 2021.
- [13] Alicia Curth and Mihaela van der Schaar. Doing great at estimating cate? on the neglected assumptions in benchmark comparisons of treatment effect estimators. *arXiv preprint arXiv:2107.13346*, 2021.
- [14] Alicia Curth and Mihaela van der Schaar. Nonparametric estimation of heterogeneous treatment effects: From theory to learning algorithms. In *International Conference on Artificial Intelligence and Statistics*, pages 1810–1818. PMLR, 2021.
- [15] Alicia Curth and Mihaela van der Schaar. On inductive biases for heterogeneous treatment effect estimation. *Advances in Neural Information Processing Systems*, 34:15883–15894, 2021.
- [16] Gerald DeJong and Raymond Mooney. Explanation-based learning: An alternative view. *Machine learning*, 1986.
- [17] Qiaonan Duan, Corey Flynn, Mario Niepel, Marc Hafner, Jeremy L Muhlich, Nicolas F Fernandez, Andrew D Rouillard, Christopher M Tan, Edward Y Chen, Todd R Golub, et al. Lincs canvas browser: interactive web app to query, browse and interrogate lincs l1000 gene expression signatures. *Nucleic acids research*, 42(W1):W449–W460, 2014.



- [18] Chelsea Finn, Pieter Abbeel, and Sergey Levine. Model-agnostic meta-learning for fast adaptation of deep networks. In *International conference on machine learning*, pages 1126–1135. PMLR, 2017.
- [19] Dennis Frauen and Stefan Feuerriegel. Estimating individual treatment effects under unobserved confounding using binary instruments. *arXiv preprint arXiv:2208.08544*, 2022.
- [20] Mahmoud Ghandi, Franklin W Huang, Judit Jané-Valbuena, Gregory V Kryukov, Christopher C Lo, E Robert McDonald, 3rd, Jordi Barretina, Ellen T Gelfand, Craig M Bielski, Haoxin Li, Kevin Hu, Alexander Y Andreev-Drakhlin, Jaegil Kim, Julian M Hess, Brian J Haas, François Aguet, Barbara A Weir, Michael V Rothberg, Brenton R Paoella, Michael S Lawrence, Rehan Akbani, Yiling Lu, Hong L Tiv, Prafulla C Gokhale, Antoine de Weck, Ali Amin Mansour, Coyin Oh, Juliann Shih, Kevin Hadi, Yanay Rosen, Jonathan Bistline, Kavitha Venkatesan, Anupama Reddy, Dmitriy Sonkin, Manway Liu, Joseph Lehar, Joshua M Korn, Dale A Porter, Michael D Jones, Javad Golji, Giordano Caponigro, Jordan E Taylor, Caitlin M Dunning, Amanda L Creech, Allison C Warren, James M McFarland, Mahdi Zamanighomi, Audrey Kauffmann, Nicolas Stransky, Marcin Imielinski, Yosef E Maruvka, Andrew D Cherniack, Aviad Tsherniak, Francisca Vazquez, Jacob D Jaffe, Andrew A Lane, David M Weinstock, Cory M Johannessen, Michael P Morrissey, Frank Stegmeier, Robert Schlegel, William C Hahn, Gad Getz, Gordon B Mills, Jesse S Boehm, Todd R Golub, Levi A Garraway, and William R Sellers. Next-generation characterization of the cancer cell line encyclopedia. *Nature*, 569(7757):503–508, May 2019.
- [21] Donald P Green and Holger L Kern. Modeling heterogeneous treatment effects in survey experiments with bayesian additive regression trees. *Public opinion quarterly*, 76(3):491–511, 2012.
- [22] Lin Lawrence Guo, Ethan Steinberg, Scott Lanyon Fleming, Jose Posada, Joshua Lemmon, Stephen R Pfohl, Nigam Shah, Jason Fries, and Lillian Sung. Ehr foundation models improve robustness in the presence of temporal distribution shift. *medRxiv*, 2022.
- [23] Shonosuke Harada and Hisashi Kashima. Graphite: Estimating individual effects of graph-structured treatments. In *Proceedings of the 30th ACM International Conference on Information & Knowledge Management*, pages 659–668, 2021.
- [24] Negar Hassanpour and Russell Greiner. Counterfactual regression with importance sampling weights. In *IJCAI*, pages 5880–5887, 2019.
- [25] Negar Hassanpour and Russell Greiner. Learning disentangled representations for counterfactual regression. In *International Conference on Learning Representations*, 2019.
- [26] Trevor Hastie, Robert Tibshirani, Jerome H Friedman, and Jerome H Friedman. *The elements of statistical learning: data mining, inference, and prediction*, volume 2. Springer, 2009.
- [27] Leon Hetzel, Simon Böhm, Niki Kilbertus, Stephan Günnemann, Mohammad Lotfollahi, and Fabian Theis. Predicting single-cell perturbation responses for unseen drugs. *arXiv preprint arXiv:2204.13545*, 2022.
- [28] Jennifer L Hill. Bayesian nonparametric modeling for causal inference. *Journal of Computational and Graphical Statistics*, 20(1):217–240, 2011.
- [29] Jennifer L Hill, Jeanne Brooks-Gunn, and Jane Waldfogel. Sustained effects of high participation in an early intervention for low-birth-weight premature infants. *Developmental psychology*, 39(4):730, 2003.
- [30] Timothy Hospedales, Antreas Antoniou, Paul Micaelli, and Amos Storkey. Meta-learning in neural networks: A survey. *IEEE transactions on pattern analysis and machine intelligence*, 44(9):5149–5169, 2021.
- [31] Guido W Imbens and Donald B Rubin. *Causal inference in statistics, social, and biomedical sciences*. Cambridge University Press, 2015.
- [32] Fredrik Johansson, Uri Shalit, and David Sontag. Learning representations for counterfactual inference. In *International conference on machine learning*, pages 3020–3029. PMLR, 2016.

- [33] Jean Kaddour, Yuchen Zhu, Qi Liu, Matt J Kusner, and Ricardo Silva. Causal effect inference for structured treatments. *Advances in Neural Information Processing Systems*, 34:24841–24854, 2021.
- [34] Edward H Kennedy. Optimal doubly robust estimation of heterogeneous causal effects. *arXiv preprint arXiv:2004.14497*, 2020.
- [35] Edward H Kennedy. Towards optimal doubly robust estimation of heterogeneous causal effects (2020). URL <https://arxiv.org/abs>, 2020.
- [36] Jitender Mohan Khunger, S Arulsevi, Uma Sharma, Sunil Ranga, and VH Talib. Pancytopenia—a clinico haematological study of 200 cases. *Indian journal of pathology & microbiology*, 45(3):375–379, 2002.
- [37] Pang Wei Koh, Shiori Sagawa, Henrik Marklund, Sang Michael Xie, Marvin Zhang, Akshay Balsubramani, Weihua Hu, Michihiro Yasunaga, Richard Lanus Phillips, Irena Gao, et al. Wilds: A benchmark of in-the-wild distribution shifts. In *International Conference on Machine Learning (ICML)*, 2021.
- [38] Andrei V Konstantinov, Stanislav R Kirpichenko, and Lev V Utkin. Heterogeneous treatment effect with trained kernels of the nadaraya-watson regression. *arXiv preprint arXiv:2207.09139*, 2022.
- [39] N Kostantinos. Gaussian mixtures and their applications to signal processing. *Advanced signal processing handbook: theory and implementation for radar, sonar, and medical imaging real time systems*, pages 3–1, 2000.
- [40] Michael Kuhn, Ivica Letunic, Lars Juhl Jensen, and Peer Bork. The sider database of drugs and side effects. *Nucleic acids research*, 44(D1):D1075–D1079, 2016.
- [41] R Kumar, SP Kalra, H Kumar, AC Anand, and H Madan. Pancytopenia—a six year study. *The Journal of the Association of Physicians of India*, 49:1078–1081, 2001.
- [42] Sören R Künnel, Jasjeet S Sekhon, Peter J Bickel, and Bin Yu. Metalearners for estimating heterogeneous treatment effects using machine learning. *Proceedings of the national academy of sciences*, 116(10):4156–4165, 2019.
- [43] Nikolay Kuznetsov and Alexander Nazarov. Sharp constants in the poincaré, steklov and related inequalities (a survey). *Mathematika*, 61(2):328–344, 2015.
- [44] Greg Landrum et al. Rdkit: Open-source cheminformatics. 2006.
- [45] Michel Ledoux. Concentration of measure and logarithmic sobolev inequalities. In *Seminaire de probabilites XXXIII*, pages 120–216. Springer, 1999.
- [46] Hongzhu Li, Xiangrui Gao, and Yafeng Deng. Stargraph: A coarse-to-fine representation method for large-scale knowledge graph, 2022.
- [47] Michelle M Li, Kexin Huang, and Marinka Zitnik. Graph representation learning in biomedicine and healthcare. *Nature Biomedical Engineering*, pages 1–17, 2022.
- [48] Jing Ma, Ruocheng Guo, Aidong Zhang, and Jundong Li. Multi-cause effect estimation with disentangled confounder representation. In *Proceedings of the Thirtieth International Joint Conference on Artificial Intelligence*, 2021.
- [49] Ron Meir and Tong Zhang. Generalization error bounds for bayesian mixture algorithms. *Journal of Machine Learning Research*, 4(Oct):839–860, 2003.
- [50] Stephen L Morgan and Christopher Winship. *Counterfactuals and causal inference*. Cambridge University Press, 2015.
- [51] Alex Nichol, Joshua Achiam, and John Schulman. On first-order meta-learning algorithms. *arXiv preprint arXiv:1803.02999*, 2018.

- [52] Alex Nichol and John Schulman. Reptile: a scalable metalearning algorithm. *arXiv preprint arXiv:1803.02999*, 2(3):4, 2018.
- [53] Xinkun Nie and Stefan Wager. Quasi-oracle estimation of heterogeneous treatment effects. *Biometrika*, 108(2):299–319, 2021.
- [54] Frank Nielsen and Richard Nock. On the chi square and higher-order chi distances for approximating f-divergences. *IEEE Signal Processing Letters*, 21(1):10–13, 2013.
- [55] Hamed Nilforoshan and Eugene Wu. Leveraging quality prediction models for automatic writing feedback. In *Twelfth International AAAI Conference on Web and Social Media*, 2018.
- [56] Lawrence E Payne and Hans F Weinberger. An optimal poincaré inequality for convex domains. *Archive for Rational Mechanics and Analysis*, 5(1):286–292, 1960.
- [57] Henri Poincaré. Sur les équations aux dérivées partielles de la physique mathématique. *American Journal of Mathematics*, pages 211–294, 1890.
- [58] Zhaozhi Qian, Alicia Curth, and Mihaela van der Schaar. Estimating multi-cause treatment effects via single-cause perturbation. *Advances in Neural Information Processing Systems*, 34:23754–23767, 2021.
- [59] Aniruddh Raghu, Maithra Raghu, Samy Bengio, and Oriol Vinyals. Rapid learning or feature reuse? towards understanding the effectiveness of maml. *arXiv preprint arXiv:1909.09157*, 2019.
- [60] Bernardino Romera-Paredes and Philip Torr. An embarrassingly simple approach to zero-shot learning. In *International conference on machine learning*, pages 2152–2161. PMLR, 2015.
- [61] Yusuf Roohani, Kexin Huang, and Jure Leskovec. Gears: Predicting transcriptional outcomes of novel multi-gene perturbations. *bioRxiv*, 2022.
- [62] Shiv Kumar Saini, Sunny Dhamnani, Akil Arif Ibrahim, and Prithviraj Chavan. Multiple treatment effect estimation using deep generative model with task embedding. In *The World Wide Web Conference*, pages 1601–1611, 2019.
- [63] Tim Salimans and Durk P Kingma. Weight normalization: A simple reparameterization to accelerate training of deep neural networks. *Advances in neural information processing systems*, 29, 2016.
- [64] André Schlichting. Poincaré and log–sobolev inequalities for mixtures. *Entropy*, 21(1):89, 2019.
- [65] Jürgen Schmidhuber. *Evolutionary principles in self-referential learning, or on learning how to learn: the meta-meta-... hook*. PhD thesis, Technische Universität München, 1987.
- [66] Uri Shalit, Fredrik D Johansson, and David Sontag. Estimating individual treatment effect: generalization bounds and algorithms. In *International Conference on Machine Learning*, pages 3076–3085. PMLR, 2017.
- [67] Ankit Sharma, Garima Gupta, Ranjitha Prasad, Arnab Chatterjee, Lovekesh Vig, and Gautam Shroff. Metaci: Meta-learning for causal inference in a heterogeneous population. *arXiv preprint arXiv:1912.03960*, 2019.
- [68] Claudia Shi, David Blei, and Victor Veitch. Adapting neural networks for the estimation of treatment effects. *Advances in neural information processing systems*, 32, 2019.
- [69] Yishai Shimoni, Chen Yanover, Ehud Karavani, and Yaara Goldschmidt. Benchmarking framework for performance-evaluation of causal inference analysis. *arXiv preprint arXiv:1802.05046*, 2018.
- [70] Aravind Subramanian, Rajiv Narayan, Steven M Corsello, David D Peck, Ted E Natoli, Xiaodong Lu, Joshua Gould, John F Davis, Andrew A Tubelli, Jacob K Asiedu, David L Lahr, Jodi E Hirschman, Zihan Liu, Melanie Donahue, Bina Julian, Mariya Khan, David Wadden, Ian C Smith, Daniel Lam, Arthur Liberzon, Courtney Toder, Mukta Bagul, Marek Orzechowski, Oana M Enache, Federica Piccioni, Sarah A Johnson, Nicholas J Lyons, Alice H Berger, Alykhan F Shamji, Angela N Brooks, Anita Vrcic, Corey Flynn, Jacqueline Rosains, David Y

- 545 Takeda, Roger Hu, Desiree Davison, Justin Lamb, Kristin Ardlie, Larson Hogstrom, Peyton  
546 Greenside, Nathanael S Gray, Paul A Clemons, Serena Silver, Xiaoyun Wu, Wen-Ning Zhao,  
547 Willis Read-Button, Xiaohua Wu, Stephen J Haggarty, Lucienne V Ronco, Jesse S Boehm,  
548 Stuart L Schreiber, John G Doench, Joshua A Bittker, David E Root, Bang Wong, and Todd R  
549 Golub. A next generation connectivity map: L1000 platform and the first 1,000,000 profiles.  
550 *Cell*, 171(6):1437–1452.e17, November 2017.
- 551 [71] Nicholas P Tatonetti, Patrick P Ye, Roxana Daneshjou, and Russ B Altman. Data-driven prediction  
552 of drug effects and interactions. *Science translational medicine*, 4(125):125ra31–125ra31, 2012.
- 553 [72] Sebastian Thrun and Lorien Pratt. *Learning to learn*. Springer Science & Business Media, 2012.
- 554 [73] Vladimir Vapnik. Principles of risk minimization for learning theory. *Advances in neural  
555 information processing systems*, 4, 1991.
- 556 [74] Victor Veitch, Dhanya Sridhar, and David Blei. Adapting text embeddings for causal inference.  
557 In *Conference on Uncertainty in Artificial Intelligence*, pages 919–928. PMLR, 2020.
- 558 [75] Stefan Wager. Stats 361: Causal inference, 2020.
- 559 [76] Stefan Wager and Susan Athey. Estimation and inference of heterogeneous treatment effects using  
560 random forests. *Journal of the American Statistical Association*, 113(523):1228–1242, 2018.
- 561 [77] Wei Wang, Vincent W Zheng, Han Yu, and Chunyan Miao. A survey of zero-shot learning:  
562 Settings, methods, and applications. *ACM Transactions on Intelligent Systems and Technology  
563 (TIST)*, 10(2):1–37, 2019.
- 564 [78] Yixin Wang and David M Blei. The blessings of multiple causes. *Journal of the American  
565 Statistical Association*, 114(528):1574–1596, 2019.
- 566 [79] Galen Weld, Peter West, Maria Glenski, David Arbour, Ryan A Rossi, and Tim Althoff.  
567 Adjusting for confounders with text: Challenges and an empirical evaluation framework for  
568 causal inference. In *Proceedings of the International AAAI Conference on Web and Social Media*,  
569 volume 16, pages 1109–1120, 2022.
- 570 [80] Yongqin Xian, Bernt Schiele, and Zeynep Akata. Zero-shot learning-the good, the bad and the  
571 ugly. In *Proceedings of the IEEE conference on computer vision and pattern recognition*, pages  
572 4582–4591, 2017.
- 573 [81] Steve Yadlowsky, Scott Fleming, Nigam Shah, Emma Brunskill, and Stefan Wager. Evaluating  
574 treatment prioritization rules via rank-weighted average treatment effects. *arXiv preprint  
575 arXiv:2111.07966*, 2021.
- 576 [82] Michihiro Yasunaga, Hongyu Ren, Antoine Bosselut, Percy Liang, and Jure Leskovec. QA-GNN:  
577 Reasoning with language models and knowledge graphs for question answering. In *North  
578 American Chapter of the Association for Computational Linguistics (NAACL)*, 2021.
- 579 [83] Shing-Tung Yau. Isoperimetric constants and the first eigenvalue of a compact riemannian man-  
580 ifold. In *Annales Scientifiques de l’École Normale Supérieure*, volume 8, pages 487–507, 1975.
- 581 [84] Jinsung Yoon, James Jordon, and Mihaela Van Der Schaar. Ganite: Estimation of individualized  
582 treatment effects using generative adversarial nets. In *International Conference on Learning  
583 Representations*, 2018.
- 584 [85] Long Yu, Zhicong Luo, Huanyong Liu, Deng Lin, Hongzhu Li, and Yafeng Deng. Triplere: Knowl-  
585 edge graph embeddings via tripled relation vectors. *arXiv preprint arXiv:2209.08271*, 2022.
- 586 [86] Yao Zhang, Alexis Bellot, and Mihaela Schaar. Learning overlapping representations for  
587 the estimation of individualized treatment effects. In *International Conference on Artificial  
588 Intelligence and Statistics*, pages 1005–1014. PMLR, 2020.
- 589 [87] Marinka Zitnik, Monica Agrawal, and Jure Leskovec. Modeling polypharmacy side effects with  
590 graph convolutional networks. *Bioinformatics*, 34(13):i457–i466, 2018.
